1 Fine-tuned adaptation of embryo-endometrium pairs at implantation revealed by gene regulatory networks

2 Tailored conceptus-maternal communication at implantation

3

4 Fernando H. Biase<sup>a\*</sup>, Isabelle Hue<sup>b</sup>, Sarah E. Dickinson<sup>a</sup>, Florence Jaffrezic<sup>c</sup>, Denis Laloe<sup>c</sup>, Harris Lewin<sup>d</sup>,

5 Olivier Sandra<sup>b\*</sup>

6 a Department of Animal Sciences, Auburn University, Auburn, AL, USA 36839

7 b INRA, UMR 1198 Biologie du Développement et Reproduction, Ecole Nationale Vétérinaire d'Alfort, F-

8 78350 Jouy-en-Josas, France 78352

9 c UMR Génétique Animale et Biologie Intégrative, Institut National de la Recherche Agronomique, Jouy en

10 Josas, France 78352

11 d Department of Evolution and Ecology, University of California, Davis, CA, USA 95616

12 \*Corresponding authors:

13 Fernando Biase; 559 Devall Drive, Auburn, AL, USA, 36839; email: [fbiase@auburn.edu](mailto:fbiase@auburn.edu); phone: 334-844-

14 1680; fax: 334-844-1519

15 Olivier Sandra; UMR 1198 INRA-ENVA Biologie du Développement et Reproduction, Domaine de Vilvert,

16 bâtiment 230-231, Jouy-en-Josas, France 78352; email: [olivier.sandra@inra.fr](mailto:olivier.sandra@inra.fr); phone: 00 33 1 34 65 23

17 43; fax: 00 33 1 34 65 23 64

18 Keywords: early pregnancy, system biology, embryo, cattle

19 **ABSTRACT**

20 Interactions between embryo and endometrium at implantation are critical for the progression and the issue  
21 of pregnancy. These reciprocal actions involve exchange of paracrine signals that govern implantation and  
22 placentation. However, it remains unknown how these interactions between the conceptus and the  
23 endometrium are coordinated at the level of an individual pregnancy. Under the hypothesis that gene  
24 expression of endometrium is dependent on gene expression of extraembryonic tissues, we performed an  
25 integrative analysis of transcriptome profiles of paired conceptuses and endometria obtained from  
26 pregnancies initiated by artificial insemination. We quantified strong dependence ( $|r|>0.95$ ,  $eFDR<0.01$ ) in  
27 transcript abundance of genes expressed in the extraembryonic tissues and genes expressed in the  
28 endometrium. The profiles of connectivity revealed distinct co-expression patterns of extraembryonic  
29 tissues with caruncular and intercaruncular areas of the endometrium. Notably, a subset of highly co-  
30 expressed genes between conceptus ( $n=229$ ) and caruncular areas of the endometrium ( $n=218$ ,  $r>0.9999$ ,  
31  $eFDR<0.001$ ) revealed a blueprint of gene expression specific to each pregnancy. Functional analyses of  
32 genes co-expressed between conceptus and endometrium revealed significantly enriched functional  
33 modules with critical contribution for implantation and placentation, including “in utero embryonic  
34 development”, “placenta development” and “regulation of transcription”. Functional modules were  
35 remarkably specific to caruncular or intercaruncular areas of the endometrium. The quantitative and  
36 functional association between genes expressed in conceptus and endometrium emphasize a coordinated  
37 communication between these two entities in mammals. To our knowledge, we provide first evidence that  
38 implantation in mammalian pregnancy relies on the ability of the conceptus and the endometrium to develop  
39 a fine-tuned adaptive response characteristic of each pregnancy.

## 40 INTRODUCTION

41 In mammals, pregnancy recognition requires a tightly synchronized exchange of signals between the  
42 competent embryo and the receptive endometrium. The initiation of this signaling is triggered by key factors  
43 produced by the conceptus (1, 2) which are translated by the endometrial cells into actions that will condition  
44 the trajectory of embryo development as well as progeny phenotype. In mammalian species, including  
45 human, rodents and ruminants, the delicate balance in embryo-maternal communication is affected by the  
46 way the embryos are generated (natural mating, artificial insemination, *in vitro* fertilization somatic cell  
47 nuclear transfer) and by the sensor-driver properties of the endometrium defined by intrinsic maternal  
48 factors (i.e.: maternal metabolism, ageing) and environmental perturbations (i.e.: pathogens, nutrition) (3-  
49 5). The concept of sensor property applied to the mammalian endometrium was first proposed in a pioneer  
50 paper as was suggested the notion of endometrial plasticity (6). This property was recently confirmed *in*  
51 *vitro* with an aberrant responsiveness of human endometrial stromal cultured cells in the context of recurrent  
52 pregnancy loss (7). Nevertheless, it remains unaddressed whether the mammalian endometrium is able to  
53 develop an adaptive embryo-tailored response in a normal pregnancy.

54 In mammalian reproduction, sheep and cattle are research models that have relevantly contributed key  
55 insights in the understanding of molecular and physiological pregnancy-associated mechanisms, including  
56 the deciphering of embryo-endometrium interactions (8, 9). In the bovine species, by gestation days 7-8,  
57 the blastocyst enters the uterine lumen. After hatching by days 8-9, the outer monolayer of trophoblast  
58 cells establishes direct contact with the luminal epithelium of the endometrium (10). On gestation days 12-  
59 13, the blastocyst is ovoid in shape (~2-5 mm) and transitions into a tubular shape by days 14-15. By day  
60 ~15, rapidly proliferating trophoblast cells of the extra-embryonic tissues synthesize and release IFNT  
61 (11-15), which is the major pregnancy recognition signal in ruminants (1, 9, 16, 17). The disrupted release  
62 of the oxytocin-dependent pulses of prostaglandin F<sub>2</sub> alpha (18) allows maintenance of progesterone  
63 production by a functional corpus luteum (18), which is critical for the establishment and progression of  
64 pregnancy (1, 4, 9, 12, 14, 15, 19). IFNT actions include induction of numerous classical and non-classical  
65 IFN-stimulated genes and stimulation of progesterone-induced genes that encode proteins involved in  
66 conceptus elongation and implantation (4). IFNT-regulated genes have diverse actions in the endometrium

67 that are essential for conceptus survival and pregnancy establishment (12). Other paracrine signals such  
68 as prostaglandins and cortisol have regulatory effects on conceptus elongation and endometrium  
69 remodeling (20). More recently, the identification of potential ligand-receptor interactions between the  
70 conceptus and endometrium (21) and the secretion of proteins and RNAs through exosomes (22, 23) have  
71 expanded the field of possibilities by which the conceptus and endometrium interact prior to and during  
72 implantation.

73 The cross-talk between the conceptus and the endometrium is associated with the expression and  
74 regulation of a wealth of genes in each entity (24, 25). The nature of the conceptus modifies gene  
75 expression of the endometrium in cattle (6, 26, 27) and decidualizing human endometrial stromal cells (28).  
76 Similarly, the endometrium from dams with different fertility potentials (29) or metabolic status (30)  
77 influences the gene expression of the conceptus. Despite the growing evidence of the interactions between  
78 conceptus and endometrium at the level of gene regulation, the pathways and the functions that result from  
79 this interaction have yet to be unveiled. Furthermore, the lack of integrated analysis between paired  
80 conceptus and endometrium has made it challenging to advance our understanding of the functional  
81 interactions between these two entities in normal pregnancies.

82 Here, we hypothesized that gene expression of extraembryonic tissue is not independent from gene  
83 expression of endometrium. In the present study, we carried out an integrative analysis of transcriptome  
84 profiles of paired conceptuses and endometria at the onset of implantation aiming at the identification of  
85 regulatory pathways that have coordinated expression between the conceptus and endometrium in normal  
86 pregnancies. Surprisingly, our results show that at gestation day 18 in cattle, several hundred genes have  
87 an expression profile in conceptus and caruncular areas of the endometrium that is unique to each  
88 pregnancy. Analyses of genes co-expressed between the conceptus and the paired-associated  
89 endometrium revealed significantly enriched functional modules with critical contribution for implantation  
90 and placentation. Our data provide evidence that successful implantation in mammalian pregnancy relies  
91 on the ability of the endometrium to elicit a fine-tuned adaptive response to the conceptus.

## 92 **RESULTS**

## 93 **Data overview**

94 We analyzed the RNA-sequencing data that consisted of samples collected from five cattle pregnancies  
95 terminated at gestation day 18 (GSE74152 (26)). The conceptus was dissected, and transcriptome data  
96 was generated for extraembryonic tissue; whereas the endometrium was dissected into caruncular (gland-  
97 free) and intercaruncular (containing endometrial glands) areas, and transcriptome data was generated  
98 from both regions of the endometrium (Fig 1A). Therefore, the dataset analyzed was comprised of three  
99 samples collected from each pregnancy: extraembryonic, caruncular, and intercaruncular tissues (Fig 1B).  
100 Alignment of the sequences to the *Bos taurus* genome (UMD 3.1) resulted into an average of 22, 31.4, and  
101 34.6 million uniquely mapped reads for extraembryonic (n = 5), caruncular (n = 5), and intercaruncular (n =  
102 5) tissues, respectively. We quantified the transcript abundance of 9548, 13047, and 13051 genes in  
103 extraembryonic, caruncular, and intercaruncular tissues, respectively (Fig 1C). Unsupervised clustering of  
104 the samples based on their transcriptome data separated the samples obtained from the conceptus from  
105 the endometrial samples and further distinguished caruncular from intercaruncular endometrial samples  
106 (Fig 1D).

107

108 Fig 1. Transcriptome profiling of conceptus and endometrium collected from gestation day 18. (A)  
109 Representative images of pregnant uterus and micrograph identifying the tissues from which RNA-seq data  
110 were used in this study. (B) Data structure used in this study. Data on genome-wide transcript abundance  
111 was obtained from extraembryonic tissue (EET) and endometrium (caruncular (CAR), intercaruncular  
112 (ICAR) tissues) from five pregnant uteri. (C) Number of genes with transcript abundance quantified in each  
113 sample. (D) Dimensionality reduction of the RNA-seq data for special visualization of the sample  
114 distribution.

115

## 116 **Correlated gene expression between conceptus and endometrium**

117 The associated expression between two genes can be assessed by correlative metrics (31) within (32, 33)  
118 or between tissues (33, 34). Thus, we calculated Pearson's coefficient of correlation ( $r$  (35)) to test whether  
119 there is association between the transcript abundance of genes expressed in extraembryonic tissue and  
120 endometrium (caruncular or intercaruncular tissues). We reasoned that under a null hypothesis, the  
121 abundance of a gene expressed in extraembryonic tissue ( $G_j$ ) would have no association with the  
122 abundance of a gene expressed in endometrium ( $G_k$ , or  $G_l$ ), for example:  $H_0: r_{(G_j, G_k)} \approx 0$ . On the other hand,  
123 under the alternative hypothesis ( $H_1: r_{(G_j, G_k)} \neq 0$ ), two genes display co-expression (35).

124 The distribution of correlation coefficients for all pairs of genes expressed in extraembryonic and caruncular  
125 tissues averaged 0.13 (Fig 2A), and the equivalent distribution obtained for all pairs of genes expressed in  
126 extraembryonic and intercaruncular tissues averaged 0.03 (Fig 2B). Both distributions deviated significantly  
127 from a distribution obtained from shuffled data that disrupted the pairing of the conceptus and endometrium  
128 ( $P < 2.2 \cdot 10^{-16}$ , S1 Fig). We calculated the empirical FDR (eFDR) and noted that absolute correlation coefficients  
129 in both distributions were highly significant when greater than 0.95 (eFDR  $< 0.007$ , S2 Fig, S1 Table). Of  
130 note, S3 Fig and S4 Fig present examples of pairs of genes we identified with the highest positive and  
131 negative correlation coefficients, which fit the alternative hypothesis ( $H_1: r_{(G_j, G_k)} \neq 0$ ) and examples of pairs  
132 of genes that show correlation coefficients close to zero fitting the null hypothesis ( $H_0: r_{(G_j, G_k)} \approx 0$ ).

133

134 Fig 2. Co-expression analysis between extraembryonic tissue and endometrium. Distribution of the  
135 correlation coefficients for genes expressed in extraembryonic (EET) and caruncular (CAR) tissues (A) or  
136 intercaruncular (ICAR) tissues (B). (C) Number of genes expressed in either EET, CAR or ICAR that  
137 participate in significant correlation connections involving conceptus and endometrium. (D) Tanglengram  
138 of EET and CAR tissues formed by genes with strong co-expression. (E) Scatterplot of pairs of genes  
139 expressed in EET and CAR with at least one gene involved in "mRNA processing" or "chromatin  
140 organization". (F) Scatterplot of pairs of genes expressed in EET and CAR and highly correlated with at  
141 least one gene involved in "RNA transport pathway".

142

143 Notably, all 9548 genes expressed in extraembryonic tissue were positively ( $r > 0.95$ ) and negatively ( $-$   
144  $0.95 > r$ ) correlated with genes expressed in caruncular or intercaruncular tissues (Fig 1C). Eighty percent  
145 and 95% of the genes expressed in caruncle tissues were negatively and positively correlated with genes  
146 expressed in extraembryonic tissue. Similarly, 83% and 88% of the genes expressed in intercaruncular  
147 tissues were negatively and positively correlated with genes expressed in extraembryonic tissue (Fig 1C).  
148 The distribution of degrees of connectivity for significant correlations ( $|r| > 0.95$ , eFDR  $< 0.01$ ) between  
149 extraembryonic and caruncular tissues was not equivalent to the distribution observed between  
150 extraembryonic and intercaruncular tissues ( $P < 2.2 \cdot 10^{-16}$ ). The genes expressed in extraembryonic tissue  
151 were significantly correlated with 295 genes expressed in caruncular tissues on average (median = 101).  
152 Eleven genes were significantly correlated with over 2300 genes in caruncular tissues (i.e. *AREG*, *EGR1*,  
153 *PEX3*, *GAN*, *S5A* Fig). The genes expressed in extraembryonic tissue were significantly correlated with  
154 266 genes expressed in intercaruncular tissues on average (median = 252). Eight genes were significantly  
155 correlated with over 750 genes in intercaruncular tissues (i.e.: *WNT5B*, *WNT7B*, *ROR2*, *DPEP1*, *GJB3*,  
156 *S4B* Fig). These results strongly suggest different patterns of gene co-expression between extraembryonic  
157 and caruncular or intercaruncular tissues.

158 We then examined if genes co-expressed in extraembryonic tissue and endometrium have expression  
159 patterns that are unique to pregnancies. We identified 229 and 218 genes expressed in extraembryonic  
160 and caruncular tissues, respectively ( $|r| > 0.9999$ , eFDR  $< 0.001$ , S1 Table), whose expression profiles  
161 produced equivalent dendrograms for extraembryonic and caruncular tissues independently ( $P = 0.008$ ,  
162 Fig 2D). Functional investigation of these 441 genes identified significant enrichment in the biological  
163 processes “mRNA processing” (*GEMIN6*, *PRPF4B*, *RBM39*, *SMNDC1*, *SUPT4H1*, *U2AF1L4*, FDR = 0.13,  
164 Fig 2E), “chromatin organization” (*CDAN1*, *NUP133*, *SUPT4H1*, FDR = 0.13, Fig 2E), and “protein  
165 autoubiquitination” (*CNOT4*, *MARCH5*, *UHRF1*). We also interrogated the KEGG pathways database and  
166 identified an enrichment for the “RNA transport” pathway (*EIF4E*, *GEMIN6*, *KPNB1*, *MAGOHB*, *NUP133*,  
167 *NUP54*, *PYM1*, *SEN2*, *SUMO1*, *THOC1*, FDR = 0.06, Fig 2F). We did not identify groups of genes co-  
168 expressed in extraembryonic and intercaruncular tissues capable of producing dendrograms that mirrored

169 each other. These results demonstrate that genes highly co-expressed between extraembryonic and  
170 caruncular tissues form a signature that independently distinguishes pregnancies in an equivalent manner.

### 171 **Visualization of co-expressed networks in extraembryonic tissue and endometrium**

172 Our analysis was not an exhaustive evaluation of all potential co-expression networks that exist between  
173 conceptus and endometrium. Thus, we developed a web interface for dynamic and interactive data  
174 visualization based on the co-expression analysis conducted in the present study (36, 37)  
175 ([https://biaselab.shinyapps.io/eet\\_endo/](https://biaselab.shinyapps.io/eet_endo/)). The public access to this web application allows a user to  
176 produce networks for genes of their choosing. Furthermore, each network is accompanied by supporting  
177 data such as scatter plots and heatmaps of the gene expression values. The raw data and codes for  
178 reproduction of this interface can be downloaded from a GitHub repository  
179 ([https://github.com/BiaseLab/eet\\_endo\\_gene\\_interaction](https://github.com/BiaseLab/eet_endo_gene_interaction)).

### 180 **Functional networks between extraembryonic and caruncular tissues**

181 We investigated the transcriptome-wide interactions between extraembryonic and caruncular or  
182 intercaruncular tissues independently. The clustering of genes based on co-expression is a powerful means  
183 to understand coordinated gene functions (38), thus we used the matrix with correlation coefficients to  
184 cluster extraembryonic, caruncular, and intercaruncular tissues independently.

185 The heatmap resultant of clustering the two datasets (extraembryonic and caruncular tissues) showed the  
186 formation of an organized co-expression network between the genes expressed in extraembryonic and  
187 caruncular tissues (Fig 3A). We identified 36 clusters formed by the genes expressed in extraembryonic  
188 tissue that presented enrichment for several biological processes (FDR < 0.2, Fig 3B), where we identified  
189 several genes expressed in extraembryonic tissue significantly co-expressed with genes expressed in  
190 caruncular tissues (see S1 Data for a list of genes). For instance, 142 genes associated with regulation of  
191 transcription were identified across clusters 1, 12, 30, 38, and 54. Eighty-two genes were associated with  
192 signal transduction across clusters 1, 21, 27, and 71. Interestingly, 26 genes associated with “in utero  
193 embryonic development” were identified in cluster 1.



194

195 Fig 3. Functional analysis of co-expressed genes between extraembryonic (EET) and caruncular (CAR)  
196 tissues. (A) Heatmap produced by the correlation coefficients and independent clustering of EET and CAR.  
197 (B) Gene ontology analysis of the cluster formed. Only significant coefficients of correlation are shown ( $|r|$   
198  $> 0.95$ ,  $eFDR < 0.01$ ). The colored bar on the right of the heatmap indicates clusters of genes expressed in  
199 EET for which biological processes were significant. The colored bar on bottom of the heatmap indicates  
200 clusters of genes expressed in caruncle for which biological processes were significant. The colored  
201 squares at the bottom of the image identify the cluster number with the color observed on the bars. See S1  
202 Data and S2 Data for details on the cluster identification, biological processes and genes. (C,D) Model of  
203 functional co-expression networks possibly formed between EET and CAR.

204

205 The clustering of genes expressed in caruncular tissues according to their co-expression with  
206 extraembryonic tissue genes resulted in the identification of 32 clusters presenting enrichment ( $FDR < 0.2$ )  
207 for several Biological processes (Fig 3A, S2 Data). Among the genes forming significant co-expression with  
208 extraembryonic tissue, we identified 96 genes in cluster 3 associated with “intracellular protein transport”,  
209 as well as 111 and four genes associated with regulation of transcription in clusters 4 and 5, respectively.  
210 Notably, ten genes on cluster 15 were associated with “defense response to virus”, and the annotated  
211 genes are known to be stimulated by interferon-tau (*IFIT1*, *IFIT3*, *IFIT5*, *ISG15*, *MX1*, *MX2*, *OAS1Y*,  
212 *RSAD2*, S2 Data).

213 Next, we intersected the results of gene ontology enrichment obtained from clustering extraembryonic and  
214 caruncular tissues. We identified several biological processes on both datasets with co-expressing genes  
215 expressed in extraembryonic and caruncular tissues (S3 Data). Based on the number of genes and  
216 direction of connections, two pairs of biological processes are noteworthy. First, five genes associated with  
217 “positive regulation of cell proliferation” in extraembryonic tissue form negative co-expression connections  
218 ( $\bar{x}_r = -0.96$ ,  $n = 22$ ) with 14 genes associated with “regulation of transcription, DNA-templated” expressed  
219 in caruncle (Fig 3C). Second, ten genes associated with “transmembrane transport” in extraembryonic

220 tissue form positive co-expression connections ( $\bar{x}_r = 0.97$ ,  $n = 22$ ) with 12 genes associated with “regulation  
221 of transcription, DNA-templated” expressed in caruncle (Fig 3D). These results are coherent with a co-  
222 expression between genes expressed in extraembryonic and caruncular tissues, with functional  
223 implications to conceptus attachment and implantation.

#### 224 **Functional networks between extraembryonic and intercaruncular tissues**

225 The independent clustering of the correlation coefficients obtained from the genes expressed in  
226 extraembryonic and intercaruncular tissues also evidenced an organized co-expression network between  
227 the two tissues (Fig 4A). Twelve clusters formed by genes expressed in the extraembryonic tissue  
228 presented enrichment for biological processes (FDR < 0.2, Fig 4B, see S4 Data for a list of genes).  
229 Interestingly, there were 85 and 27 genes associated with “mRNA processing” and “stem cell population  
230 maintenance”, respectively on cluster 3. On cluster five, we identified 12 genes associated with “negative  
231 regulation of cell proliferation” and seven genes associated with “regulation of receptor activity”. On cluster  
232 eight, 5 genes were associated with “placenta development” (*ADA*, *CCNF*, *DLX3*, *PHLDA2*, *RXRA*). On  
233 cluster 17, eight genes were associated with “regulation of transcription, DNA-templated”.

234

235 Fig 4. Functional analysis of co-expressed genes between extraembryonic (EET) and intercaruncular  
236 (ICAR) tissues. (A) Heatmap produced by the correlation coefficients and independent clustering of EET  
237 and ICAR. (b) Gene ontology analysis of the cluster formed. Only significant coefficients of correlation are  
238 shown ( $|r| > 0.95$ ,  $eFDR < 0.01$ ). The colored bar on the right of the heatmap indicates clusters of genes  
239 expressed in EET for which biological processes were significant. The colored bar on bottom of the heatmap  
240 indicates clusters of genes expressed in intercaruncle for which biological processes were significant. The  
241 colored squares at the bottom of the image identify the cluster number with the color observed on the bars.  
242 See S4 Data and S5 Data for details on the cluster identification, biological processes and genes. (C,D)  
243 Model of functional co-expression networks possibly formed between EET and ICAR. See S6 fig for an  
244 enlarged version of panel C.

245

246 The clusters formed by intercaruncular genes co-expressed with extraembryonic tissue genes also  
247 highlighted significant enrichment of biological processes (FDR < 0.2, Fig 4A, see S5 Data for a list of  
248 genes). For instance, clusters one and six contained 145 and 63 genes associated with regulation of  
249 transcription, respectively. Interestingly, on cluster two, there were 149, 23, 22, and 16 genes associated  
250 with “oxidation-reduction process”, “cell redox homeostasis”, “electron transport chain”, and “tricarboxylic  
251 acid cycle”. Cluster four contained 63 genes associated with “regulation of transcription”, and cluster seven  
252 contained 11 genes associated with “fatty acid beta-oxidation”.

253 The intersection of the genes identified in enriched biological processes in clusters formed by  
254 extraembryonic and intercaruncular tissues revealed several potential functional co-expression networks  
255 between these two tissues (S6 Data). Notably, several of the intersecting categories involved processes  
256 associated with regulation of transcription or oxidation-reduction on the intercaruncular side. For instance,  
257 28 genes associated with “stem cell population maintenance” and expressed in extraembryonic tissue  
258 presented positive co-expression ( $\bar{x}_r = 0.97$ ,  $n = 305$ ) with 83 genes associated with “regulation of  
259 transcription” and expressed in intercaruncular tissues (Fig 4D). Five genes associated with “placenta  
260 development” and expressed in extraembryonic tissue presented negative co-expression ( $\bar{x}_r = -0.97$ ,  $n =$   
261 88) with 41 genes associated with “oxidation-reduction process” and expressed in intercaruncular tissues  
262 (Fig 4E).

## 263 **DISCUSSION**

264 In mammals and particularly in the bovine species, a large body of gene expression data was produced at  
265 various steps of early pregnancy derived from *in vitro* or *in vivo* produced embryos (6, 26, 27, 39), varied  
266 physiological status of the dam (40), and fertility classified heifers (29). Altogether, results based on groups  
267 analyses (conceptus or endometrium) have demonstrated different degrees of interactions between the  
268 conceptus and endometrium at the initial phases of implantation. In the present study, our objective was to  
269 shed light on the subtle interactions between the extraembryonic tissue of a conceptus and the endometrial  
270 tissue of the uterus hosting this conceptus in normal pregnancy using paired co-expression analyses of

271 gene transcript abundances. Our analyses were carried out using biological material collected from the  
272 single conceptus and the endometrium from the same pregnancy, a critical aspect to determine the cross-  
273 talk during implantation at the level of one individual pregnant female.

274 Our analyses of transcriptome data from conceptus and endometrium pairs identified key signatures of  
275 gene expression that are likely to be linked to the success of pregnancy recognition and implantation. A  
276 large proportion of all genes quantified in extraembryonic tissue and endometrium have transcript  
277 abundances that were not independent. Furthermore, the dependency observed for the abundance of  
278 transcripts between extraembryonic tissue and endometrium varied with morphologically and  
279 physiologically distinct areas of the endometrium, namely caruncular and intercaruncular tissues. For  
280 instance, there were twice as many highly positive ( $r > 0.95$ ) and approximately half the number of highly  
281 negative ( $r < -0.95$ ) co-expressing connections between extraembryonic and caruncular tissues compared  
282 to extraembryonic and intercaruncular tissues. These results greatly expand previous findings that the  
283 conceptus triggers distinct molecular responses in caruncular and intercaruncular tissues (6, 26, 41, 42).

284 During the elongation phase, the mural trophoblast proliferates rapidly (12, 25, 43) while maintaining its  
285 pluripotency (44). This period of development is modulated by dynamic regulation of gene expression (43)  
286 whereby metabolically active trophoblastic cells (45, 46) rely on the uptake of nutrients from the uterine  
287 luminal fluid (47). Our results show that caruncular and intercaruncular tissues have an active role in the  
288 programming of those functions, as several genes related with gene regulation, signal transduction, cellular  
289 proliferation, maintenance of stem cell population, and transmembrane transport are also co-expressed  
290 with genes expressed in the endometrium. The importance of gene co-regulation between extraembryonic  
291 tissue and endometrium was further supported by the identification of 26 genes associated with “in utero  
292 embryonic development” and five genes associated with “placenta development” co-regulated with genes  
293 expressed in caruncle and intercaruncle, respectively.

294 Among the genes expressed in caruncular or intercaruncular tissues that were co-expressed with  
295 extraembryonic tissues, it was noticeable that several genes were associated with regulation of gene  
296 expression. This finding is in line with former publications reporting that the regulatory network needed for

297 endometrial remodeling (48) during attachment is conceptus-dependent. In the caruncular tissue, we  
298 specifically identified 15 genes associated with “defense response to virus”, of which eight genes had their  
299 expression modulated by interferon-tau, produced by the trophoblast between gestation days 9 and 25 (49).  
300 This result provide additional knowledge on the biological actions of interferon-tau and other conceptus-  
301 originated signaling on the remodeling of the caruncle (50).

302 Our findings identified genes with high levels of co-expression ( $|r| > 0.9999$ ) between extraembryonic tissue  
303 ( $n = 229$ ) and endometrial caruncular tissues ( $n = 218$ ) whose transcript profiles independently produced  
304 equivalent discrimination of the pregnancies. Functional interrogation of these 444 genes revealed that  
305 highly co-expressed genes between extraembryonic and caruncular tissues are involved in regulatory  
306 functions at the chromatin, mRNA processing, and protein levels; which is a strong indication of a  
307 coordinated reprogramming of tissues driven by multiple layers of cell regulation during the conceptus-  
308 maternal recognition. These data prompt the need for additional investigation to better define the  
309 coordinated interactions between extra-embryonic tissues and endometrium at the level of tissue layer  
310 including luminal epithelium, stroma and glandular epithelium.

311 In the intercaruncular tissues, our analyses identified a list of genes related with “oxidation-reduction  
312 process”, a finding consistent with a recent publication reporting that proteins associated with oxidation-  
313 reduction are enriched in the uterine luminal fluid on gestation day 16 in cattle (51). Oxidative stress is a  
314 consequence of altered oxidation-reduction state (52) and transcriptional regulation of factors involved in  
315 the regulation of oxidative stress has been reported in the bovine endometrium during oestrous cycle and  
316 early pregnancy (41, 53), Furthermore, a significant increase in oxidation-reduction potential was observed  
317 in the endometrium of mice prior to implantation (54). The results show evidence that the maintenance of  
318 oxidation-reduction status permissive to the conceptus health (55) and implantation is strongly linked to  
319 genes regulated in the glandular area of the endometrium in cattle.

320 The analyses carried out in this study have provided novel insights into the molecular contribution of  
321 extraembryonic, caruncular, and intercaruncular tissues to conceptus elongation, uterine receptivity, and  
322 implantation, summarized in Fig 5. Gene products expressed by the extraembryonic tissue impact the

323 endometrial function by regulating diverse cell functions including oxidative stress, chromatin remodeling,  
324 gene transcription, mRNA processing and translation. The endometrium also exerts key regulatory roles  
325 on the extraembryonic tissue cells by modulating chromatin remodeling, gene transcription, cell  
326 proliferation, translation, metabolism, and signaling (Fig 5). Collectively, our data have shown that  
327 endometrial plasticity, a notion first suggested in cattle (6), allows unique adaptive and coordinated  
328 conceptus-matched interactions at implantation in non-pathological pregnancies.

329

330 Fig 5. Working model of most prominent biological functions modulated by co-expression between  
331 extraembryonic tissue and endometrium. The arrows indicate probable direction of interaction.

332

333 To our knowledge, this study presents the first analysis of paired conceptus and endometrium in a  
334 mammalian species, using an integrative systems biology approach. Our results provide strong evidence  
335 that implantation in mammalian pregnancy relies on the ability of the endometrium to elicit a fine-tuned  
336 adaptive response to the conceptus in normal pregnancy. This finding opens new venues for the  
337 development of strategies to improve term pregnancy rates when artificial reproductive technologies are  
338 used. Since the endometrial response is embryo-specific, it would be valuable to develop approaches  
339 aiming at selection of the competent embryo better suitable for the establishment of a successful cross-talk  
340 with the recipient uterus of the female considered for transfer.

## 341 **MATERIAL AND METHODS**

342 All analytical procedures were carried out in R software (36). The files and codes for full reproducibility of  
343 the results are listed on the S1 Code.

### 344 **Data analyzed and estimation of gene expression levels**

345 The appropriated approval from institutional committees of ethical oversight for animal use in research was  
346 obtained as reported previously (26). Briefly, all five cattle gestations were initiated by artificial insemination  
347 using semen from a single bull, and later terminated on gestation day 18 for sample collection. We analyzed  
348 RNA-seq generated from samples obtained from cattle gestations interrupted at day 18 (n = 5, GSE74152).  
349 The samples were extraembryonic tissue (n = 5), caruncle (n = 5), and intercaruncle (n = 5) regions from  
350 the endometrium.

351 The reads were aligned to the bovine genome (*Bos taurus*, UMD 3.1) using STAR aligner (56). Reads that  
352 aligned at one location of the genome with less than four mismatches were retained for elimination of  
353 duplicates. Non-duplicated reads were used for estimation of fragments per kilobase per million reads  
354 (FPKM) using Cufflinks (v.2.2.1 (57)) and Ensembl gene models (58). Genes were retained for downstream  
355 analyses is FPKM > 1 in  $\geq 4$  samples. We employed the t-Distributed Stochastic Neighbor Embedding  
356 approach (59) to assess the relatedness of the tissues.

### 357 **Calculation of correlation of gene expression between tissues**

358 Three samples were collected from the same pregnancy, thus the data structure (Fig 1B) allowed us to  
359 quantify the association between genes expressed in extraembryonic tissue and endometrium (caruncular  
360 and intercaruncular tissues). We utilized Pearson's coefficient of correlation due to its sensitivity to  
361 outliers(60) to calculate  $r_{(G_j, G_k)}$  and  $r_{(G_j, G_l)}$ , where  $G_j$ ,  $G_k$ , and  $G_l$ , are the transcript abundance of a gene  
362 expressed in extraembryonic tissue caruncle and intercaruncle respectively. Empirical FDR was calculated  
363 by permuting the pregnancy index ( $i = 1, \dots, 5$ ) for the extraembryonic tissue samples thereby breaking the  
364 pairing of conceptus and endometrium obtained per pregnancy (100 permutations) and using the formulas  
365 described elsewhere to calculate the proportion of resulting correlation resulted from the scrambled data  
366 that was greater than a specific threshold (33, 61, 62).

### 367 **Testing the resemblance of two distance matrices**

368 We calculated distance matrices for extraembryonic tissue and caruncle passed on the Pearson's  
369 coefficient of correlation of the expressed genes within tissues. The correlation matrix was subtracted from

370 one to obtain a distance matrix which was used as input for clustering using the method 'complete'. We  
371 used the Mantel statistic test implemented in the 'mantel' package to assess the correlation between the  
372 two dissimilarity matrices. The significance of the Mantel statistic was assessed by a permutation approach.

### 373 **Clustering of samples, heat maps, and network visualization**

374 We clustered samples using 'flashClust' package (63); we used the ComplexHeatmaps package (64) to  
375 draw annotated heatmaps and Cytoscape software (65) to visualize the networks.

### 376 **Testing for enrichment of gene ontology terms or KEGG pathways**

377 We tested for enrichment of gene ontology (66) categories and KEGG pathways (67) using the 'goseq'  
378 package (68). Subsets of genes were defined according to appropriate thresholds and defined as 'test  
379 genes'; the genes expressed in the corresponding tissue were then used as background for the calculation  
380 of significance values (69). Significance values were then adjusted for FDR according to the Benjamini and  
381 Hochberg method (70).

### 382 **ACKNOWLEDGEMENTS**

383 The authors would like to thank the staff of INRA experimental units (Leudeville, France; Saint-Genes-  
384 Champanelle, France; Nouzilly, France) for animal management as well as past and present members of  
385 UMR BDR including Dr. H. Jammes, M. Guillomot, A Chaulot Talmon and Corinne Giraud-Delville for help  
386 in sample collection and preparation.

387

### 388 **REFERENCES**

- 389 1. Raheem KA. An insight into maternal recognition of pregnancy in mammalian species.  
390 Journal of the Saudi Society of Agricultural Sciences. 2017;16(1):1-6.  
391 2. Bazer FW. History of Maternal Recognition of Pregnancy. Adv Anat Embryol Cell Biol.  
392 2015;216:5-25.



- 393 3. Macklon NS, Brosens JJ. The human endometrium as a sensor of embryo quality. *Biol*  
394 *Reprod.* 2014;91(4):98.
- 395 4. Sandra O, Charpigny G, Galio L, Hue I. Preattachment Embryos of Domestic Animals:  
396 Insights into Development and Paracrine Secretions. *Annu Rev Anim Biosci.* 2017;5:205-28.
- 397 5. Sandra O, Mansouri-Attia N, Lea RG. Novel aspects of endometrial function: a  
398 biological sensor of embryo quality and driver of pregnancy success. *Reprod Fertil Dev.*  
399 2011;24(1):68-79.
- 400 6. Mansouri-Attia N, Sandra O, Aubert J, Degrelle S, Everts RE, Giraud-Delville C, et al.  
401 Endometrium as an early sensor of in vitro embryo manipulation technologies. *P Natl Acad Sci*  
402 *USA.* 2009;106(14):5687-92.
- 403 7. Lucas ES, Dyer NP, Murakami K, Lee YH, Chan YW, Grimaldi G, et al. Loss of  
404 Endometrial Plasticity in Recurrent Pregnancy Loss. *Stem Cells.* 2016;34(2):346-56.
- 405 8. Lee KY, DeMayo FJ. Animal models of implantation. *Reproduction.* 2004;128(6):679-  
406 95.
- 407 9. Bazer FW. Pregnancy recognition signaling mechanisms in ruminants and pigs. *J Anim*  
408 *Sci Biotechnol.* 2013;4(1):23.
- 409 10. Carson DD, Bagchi I, Dey SK, Enders AC, Fazleabas AT, Lessey BA, et al. Embryo  
410 implantation. *Dev Biol.* 2000;223(2):217-37.
- 411 11. Robinson RS, Hammond AJ, Wathes DC, Hunter MG, Mann GE. Corpus luteum-  
412 endometrium-embryo interactions in the dairy cow: underlying mechanisms and clinical  
413 relevance. *Reprod Domest Anim.* 2008;43 Suppl 2:104-12.
- 414 12. Spencer TE, Hansen TR. Implantation and Establishment of Pregnancy in Ruminants.  
415 *Adv Anat Embryol Cell Biol.* 2015;216:105-35.
- 416 13. Roberts RM. Interferon-tau, a Type 1 interferon involved in maternal recognition of  
417 pregnancy. *Cytokine Growth Factor Rev.* 2007;18(5-6):403-8.
- 418 14. Imakawa K, Bai R, Nakamura K, Kusama K. Thirty years of interferon-tau research;  
419 Past, present and future perspective. *Anim Sci J.* 2017;88(7):927-36.
- 420 15. Martal J, Chene N, Camous S, Huynh L, Lantier F, Hermier P, et al. Recent  
421 developments and potentialities for reducing embryo mortality in ruminants: the role of IFN-tau  
422 and other cytokines in early pregnancy. *Reprod Fertil Dev.* 1997;9(3):355-80.
- 423 16. Spencer TE, Burghardt RC, Johnson GA, Bazer FW. Conceptus signals for establishment  
424 and maintenance of pregnancy. *Anim Reprod Sci.* 2004;82-83:537-50.
- 425 17. Wooding P, Burton G. Comparative Placentation: Structures, Functions and Evolution.  
426 2008:301.
- 427 18. Meyer MD, Hansen PJ, Thatcher WW, Drost M, Badinga L, Roberts RM, et al.  
428 Extension of Corpus Luteum Lifespan and Reduction of Uterine Secretion of Prostaglandin F2 $\alpha$   
429 of Cows in Response to Recombinant Interferon- $\tau$ . *J Dairy Sci.* 1995;78(9):1921-31.
- 430 19. Roberts RM, Chen Y, Ezashi T, Walker AM. Interferons and the maternal-conceptus  
431 dialog in mammals. *Semin Cell Dev Biol.* 2008;19(2):170-7.
- 432 20. Brooks K, Burns G, Spencer TE. Conceptus elongation in ruminants: roles of  
433 progesterone, prostaglandin, interferon tau and cortisol. *J Anim Sci Biotechnol.* 2014;5(1):53.
- 434 21. Mamo S, Mehta JP, Forde N, McGettigan P, Lonergan P. Conceptus-endometrium  
435 crosstalk during maternal recognition of pregnancy in cattle. *Biol Reprod.* 2012;87(1):6, 1-9.
- 436 22. Burns G, Brooks K, Wildung M, Navakanitworakul R, Christenson LK, Spencer TE.  
437 Extracellular vesicles in luminal fluid of the ovine uterus. *PLoS One.* 2014;9(3):e90913.

- 438 23. Burns GW, Brooks KE, Spencer TE. Extracellular Vesicles Originate from the Conceptus  
439 and Uterus During Early Pregnancy in Sheep. *Biol Reprod.* 2016;94(3):56.
- 440 24. Bazer FW, Wu G, Spencer TE, Johnson GA, Burghardt RC, Bayless K. Novel pathways  
441 for implantation and establishment and maintenance of pregnancy in mammals. *Mol Hum*  
442 *Reprod.* 2010;16(3):135-52.
- 443 25. Spencer TE, Forde N, Lonergan P. Insights into conceptus elongation and establishment  
444 of pregnancy in ruminants. *Reprod Fertil Dev.* 2016;29(1):84-100.
- 445 26. Biase FH, Rabel C, Guillomot M, Hue I, Andropolis K, Olmstead CA, et al. Massive  
446 dysregulation of genes involved in cell signaling and placental development in cloned cattle  
447 conceptus and maternal endometrium. *P Natl Acad Sci USA.* 2016;113(51):14492-501.
- 448 27. Bauersachs S, Ulbrich SE, Zakhartchenko V, Minten M, Reichenbach M, Reichenbach  
449 HD, et al. The endometrium responds differently to cloned versus fertilized embryos. *P Natl*  
450 *Acad Sci USA.* 2009;106(14):5681-6.
- 451 28. Brosens JJ, Salker MS, Teklenburg G, Nautiyal J, Salter S, Lucas ES, et al. Uterine  
452 selection of human embryos at implantation. *Sci Rep.* 2014;4:3894.
- 453 29. Moraes JGN, Behura SK, Geary TW, Hansen PJ, Neiberghs HL, Spencer TE. Uterine  
454 influences on conceptus development in fertility-classified animals. *P Natl Acad Sci USA.*  
455 2018;115(8):E1749-E58.
- 456 30. Forde N, Simintiras CA, Sturmey RG, Graf A, Wolf E, Blum H, et al. Effect of lactation  
457 on conceptus-maternal interactions at the initiation of implantation in cattle: I. Effects on the  
458 conceptus transcriptome and amino acid composition of the uterine luminal fluid. *Biol Reprod.*  
459 2017;97(6):798-809.
- 460 31. de Siqueira Santos S, Takahashi DY, Nakata A, Fujita A. A comparative study of  
461 statistical methods used to identify dependencies between gene expression signals. *Brief*  
462 *Bioinform.* 2014;15(6):906-18.
- 463 32. Obayashi T, Hayashi S, Shibaoka M, Saeki M, Ohta H, Kinoshita K. COXPRESdb: a  
464 database of coexpressed gene networks in mammals. *Nucleic Acids Res.* 2008;36(Database  
465 issue):D77-82.
- 466 33. Biase FH, Kimble KM. Functional signaling and gene regulatory networks between the  
467 oocyte and the surrounding cumulus cells. *BMC Genomics.* 2018;19(1):351.
- 468 34. Kogelman LJA, Fu JY, Franke L, Greve JW, Hofker M, Rensen SS, et al. Inter-Tissue  
469 Gene Co-Expression Networks between Metabolically Healthy and Unhealthy Obese  
470 Individuals. *Plos One.* 2016;11(12).
- 471 35. Song L, Langfelder P, Horvath S. Comparison of co-expression measures: mutual  
472 information, correlation, and model based indices. *BMC Bioinformatics.* 2012;13:328.
- 473 36. Ihaka R, Gentleman R. A Language and Environment for Statistical Computing. *J*  
474 *Comput Graph Stat.* 1995;5:299-14.
- 475 37. Chang W, Cheng J, Allaire J, Xie Y, McPherson J. shiny: Web Application Framework  
476 for R. R package version 1.0.5 <https://CRAN.R-project.org/package=shiny2017> [  
477 38. Swift S, Tucker A, Vinciotti V, Martin N, Orengo C, Liu X, et al. Consensus clustering  
478 and functional interpretation of gene-expression data. *Genome Biol.* 2004;5(11):R94.
- 479 39. Biase FH, Rabel C, Guillomot M, Sandra O, Andropolis K, Olmstead C, et al. Changes in  
480 WNT signaling-related gene expression associated with development and cloning in bovine  
481 extra-embryonic and endometrial tissues during the peri-implantation period. *Mol Reprod Dev.*  
482 2013;80(12):977-87.

- 483 40. Valour D, Degrelle SA, Ponter AA, Giraud-Delville C, Champion E, Guyader-Joly C, et  
484 al. Energy and lipid metabolism gene expression of D18 embryos in dairy cows is related to dam  
485 physiological status. *Physiol Genomics*. 2014;46(2):39-56.
- 486 41. Mansouri-Attia N, Aubert J, Reinaud P, Giraud-Delville C, Taghouti G, Galio L, et al.  
487 Gene expression profiles of bovine caruncular and intercaruncular endometrium at implantation.  
488 *Physiol Genomics*. 2009;39(1):14-27.
- 489 42. Walker CG, Meier S, Littlejohn MD, Lehnert K, Roche JR, Mitchell MD. Modulation of  
490 the maternal immune system by the pre-implantation embryo. *BMC Genomics*. 2010;11:474.
- 491 43. Blomberg L, Hashizume K, Viebahn C. Blastocyst elongation, trophoblastic  
492 differentiation, and embryonic pattern formation. *Reproduction*. 2008;135(2):181-95.
- 493 44. Pfeffer PL, Pearton DJ. Trophoblast development. *Reproduction*. 2012;143(3):231-46.
- 494 45. Houghton FD. Energy metabolism of the inner cell mass and trophectoderm of the mouse  
495 blastocyst. *Differentiation*. 2006;74(1):11-8.
- 496 46. Bax BE, Bloxam DL. Energy metabolism and glycolysis in human placental trophoblast  
497 cells during differentiation. *Biochim Biophys Acta*. 1997;1319(2-3):283-92.
- 498 47. Bazer FW, Johnson GA, Wu G. Amino acids and conceptus development during the peri-  
499 implantation period of pregnancy. *Adv Exp Med Biol*. 2015;843:23-52.
- 500 48. King GJ, Atkinson BA, Robertson HA. Development of the bovine placentome from  
501 days 20 to 29 of gestation. *J Reprod Fertil*. 1980;59(1):95-100.
- 502 49. Kimura K, Spate LD, Green MP, Murphy CN, Seidel GE, Jr., Roberts RM. Sexual  
503 dimorphism in interferon-tau production by in vivo-derived bovine embryos. *Mol Reprod Dev*.  
504 2004;67(2):193-9.
- 505 50. Atkinson BA, King GJ, Amoroso EC. Development of the caruncular and intercaruncular  
506 regions in the bovine endometrium. *Biol Reprod*. 1984;30(3):763-74.
- 507 51. Forde N, McGettigan PA, Mehta JP, O'Hara L, Mamo S, Bazer FW, et al. Proteomic  
508 analysis of uterine fluid during the pre-implantation period of pregnancy in cattle. *Reproduction*.  
509 2014;147(5):575-87.
- 510 52. Sies H. Oxidative stress: a concept in redox biology and medicine. *Redox Biol*.  
511 2015;4:180-3.
- 512 53. Lesage-Padilla A, Forde N, Poiree M, Healey GD, Giraud-Delville C, Reinaud P, et al.  
513 Maternal metabolism affects endometrial expression of oxidative stress and FOXL2 genes in  
514 cattle. *PLoS One*. 2017;12(12):e0189942.
- 515 54. Nakamura H, Hosono T, Kumasawa K, Kimura T. Prospective evaluation of uterine  
516 receptivity in mice. *Reprod Fertil Dev*. 2017.
- 517 55. Yoon SB, Choi SA, Sim BW, Kim JS, Mun SE, Jeong PS, et al. Developmental  
518 Competence of Bovine Early Embryos Depends on the Coupled Response Between Oxidative  
519 and Endoplasmic Reticulum Stress. *Biol Reprod*. 2014;90(5):104.
- 520 56. Dobin A, Davis CA, Schlesinger F, Drenkow J, Zaleski C, Jha S, et al. STAR: ultrafast  
521 universal RNA-seq aligner. *Bioinformatics*. 2013;29(1):15-21.
- 522 57. Trapnell C, Roberts A, Goff L, Pertea G, Kim D, Kelley DR, et al. Differential gene and  
523 transcript expression analysis of RNA-seq experiments with TopHat and Cufflinks. *Nat Protoc*.  
524 2012;7(3):562-78.
- 525 58. Flicek P, Amode MR, Barrell D, Beal K, Billis K, Brent S, et al. Ensembl 2014. *Nucleic  
526 Acids Res*. 2014;42(Database issue):D749-55.
- 527 59. van der Maaten LJP, Hinton GE. Visualizing High-Dimensional Data Using t-SNE. *J  
528 Mach Learn Res*. 2008;9:2579-605.

- 529 60. Serin EA, Nijveen H, Hilhorst HW, Ligterink W. Learning from Co-expression  
530 Networks: Possibilities and Challenges. *Front Plant Sci.* 2016;7:444.
- 531 61. Storey JD, Tibshirani R. Statistical significance for genomewide studies. *P Natl Acad Sci*  
532 *USA.* 2003;100(16):9440-5.
- 533 62. Sham PC, Purcell SM. Statistical power and significance testing in large-scale genetic  
534 studies. *Nat Rev Genet.* 2014;15(5):335-46.
- 535 63. Langfelder P, Horvath S. Fast R Functions for Robust Correlations and Hierarchical  
536 Clustering. *J Stat Softw.* 2012;46(11).
- 537 64. Gu Z, Eils R, Schlesner M. Complex heatmaps reveal patterns and correlations in  
538 multidimensional genomic data. *Bioinformatics.* 2016;32(18):2847-9.
- 539 65. Cline MS, Smoot M, Cerami E, Kuchinsky A, Landys N, Workman C, et al. Integration  
540 of biological networks and gene expression data using Cytoscape. *Nat Protoc.* 2007;2(10):2366-  
541 82.
- 542 66. Ashburner M, Ball CA, Blake JA, Botstein D, Butler H, Cherry JM, et al. Gene ontology:  
543 tool for the unification of biology. The Gene Ontology Consortium. *Nat Genet.* 2000;25(1):25-9.
- 544 67. Du J, Yuan Z, Ma Z, Song J, Xie X, Chen Y. KEGG-PATH: Kyoto encyclopedia of  
545 genes and genomes-based pathway analysis using a path analysis model. *Mol Biosyst.*  
546 2014;10(9):2441-7.
- 547 68. Young MD, Wakefield MJ, Smyth GK, Oshlack A. Gene ontology analysis for RNA-seq:  
548 accounting for selection bias. *Genome Biol.* 2010;11(2):R14.
- 549 69. Timmons JA, Szkop KJ, Gallagher IJ. Multiple sources of bias confound functional  
550 enrichment analysis of global -omics data. *Genome Biol.* 2015;16:186.
- 551 70. Benjamini Y, Hochberg Y. Controlling the False Discovery Rate - a Practical and  
552 Powerful Approach to Multiple Testing. *J Roy Stat Soc B Met.* 1995;57(1):289-300.  
553

# A Pregnancies GD 18

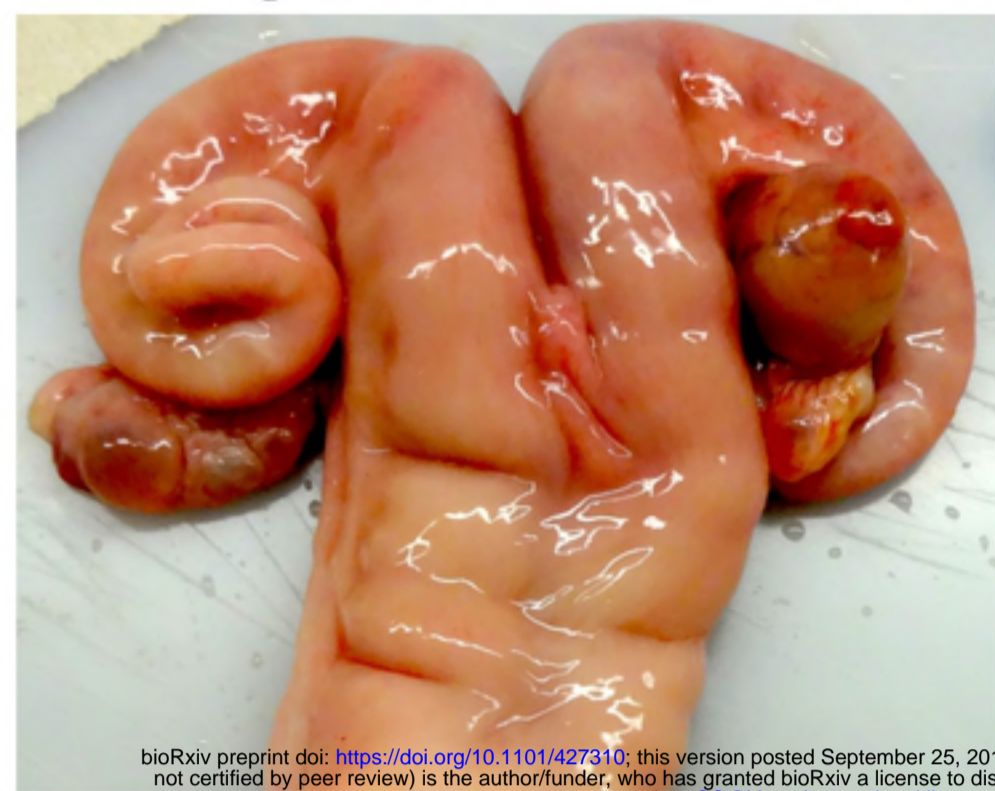

conceptus - EET

endometrium

# Tissues sampled

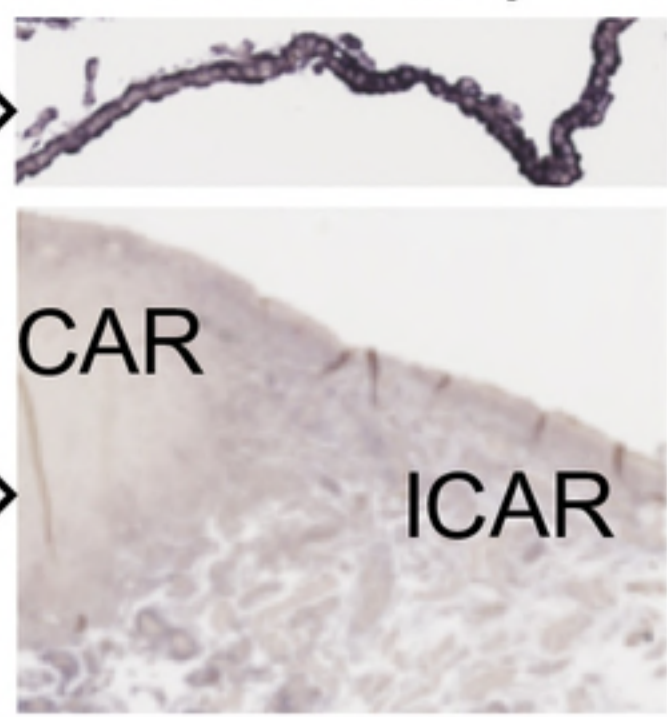

bioRxiv preprint doi: <https://doi.org/10.1101/427310>; this version posted September 25, 2018. The copyright holder for this preprint (which was not certified by peer review) is the author/funder, who has granted bioRxiv a license to display the preprint in perpetuity. It is made available under aCC-BY 4.0 International license.

# B

## Data structure

| Pregnancy | EET             | ICAR            | CAR             |
|-----------|-----------------|-----------------|-----------------|
| 1         | G <sub>1j</sub> | G <sub>1k</sub> | G <sub>1l</sub> |
| 2         | G <sub>2j</sub> | G <sub>2k</sub> | G <sub>2l</sub> |
| 3         | G <sub>3j</sub> | G <sub>3k</sub> | G <sub>3l</sub> |
| 4         | G <sub>4j</sub> | G <sub>4k</sub> | G <sub>4l</sub> |
| 5         | G <sub>5j</sub> | G <sub>5k</sub> | G <sub>5l</sub> |

# C

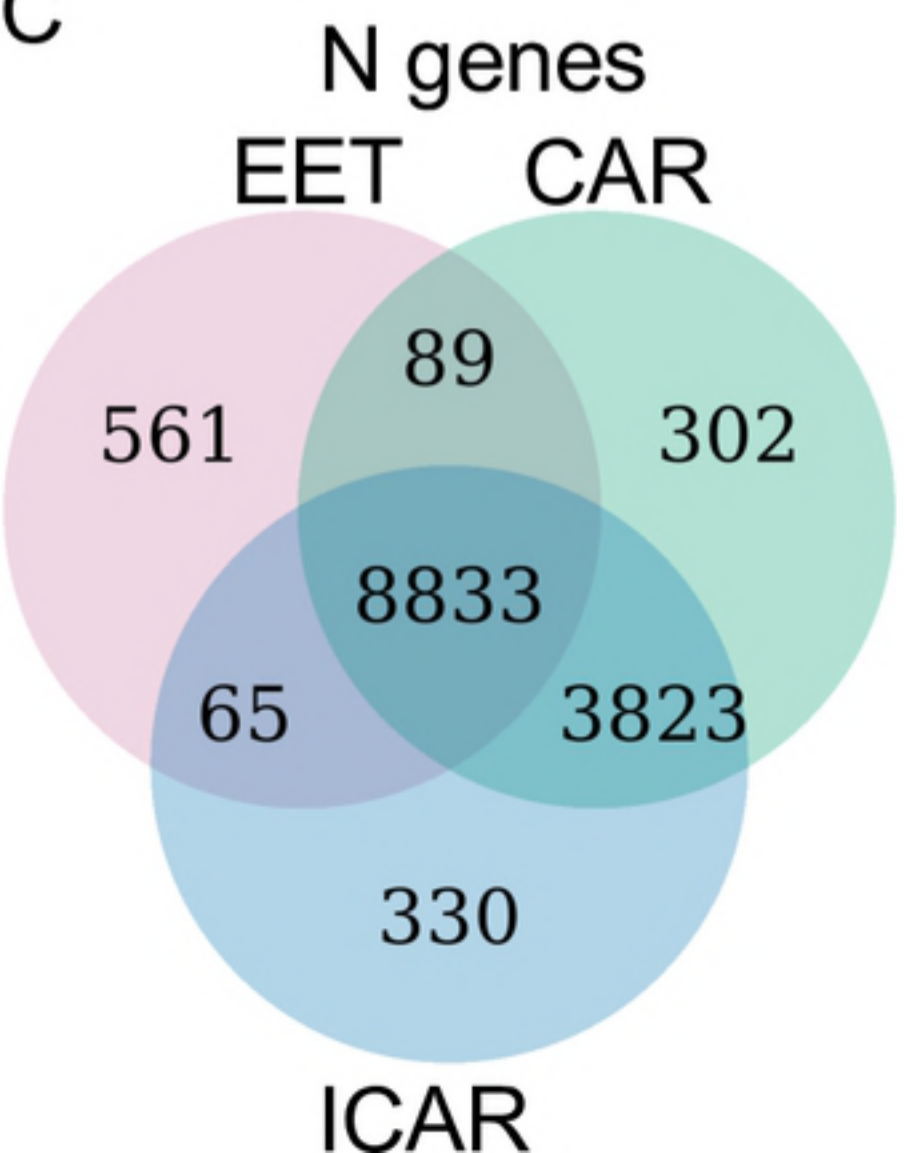

# D

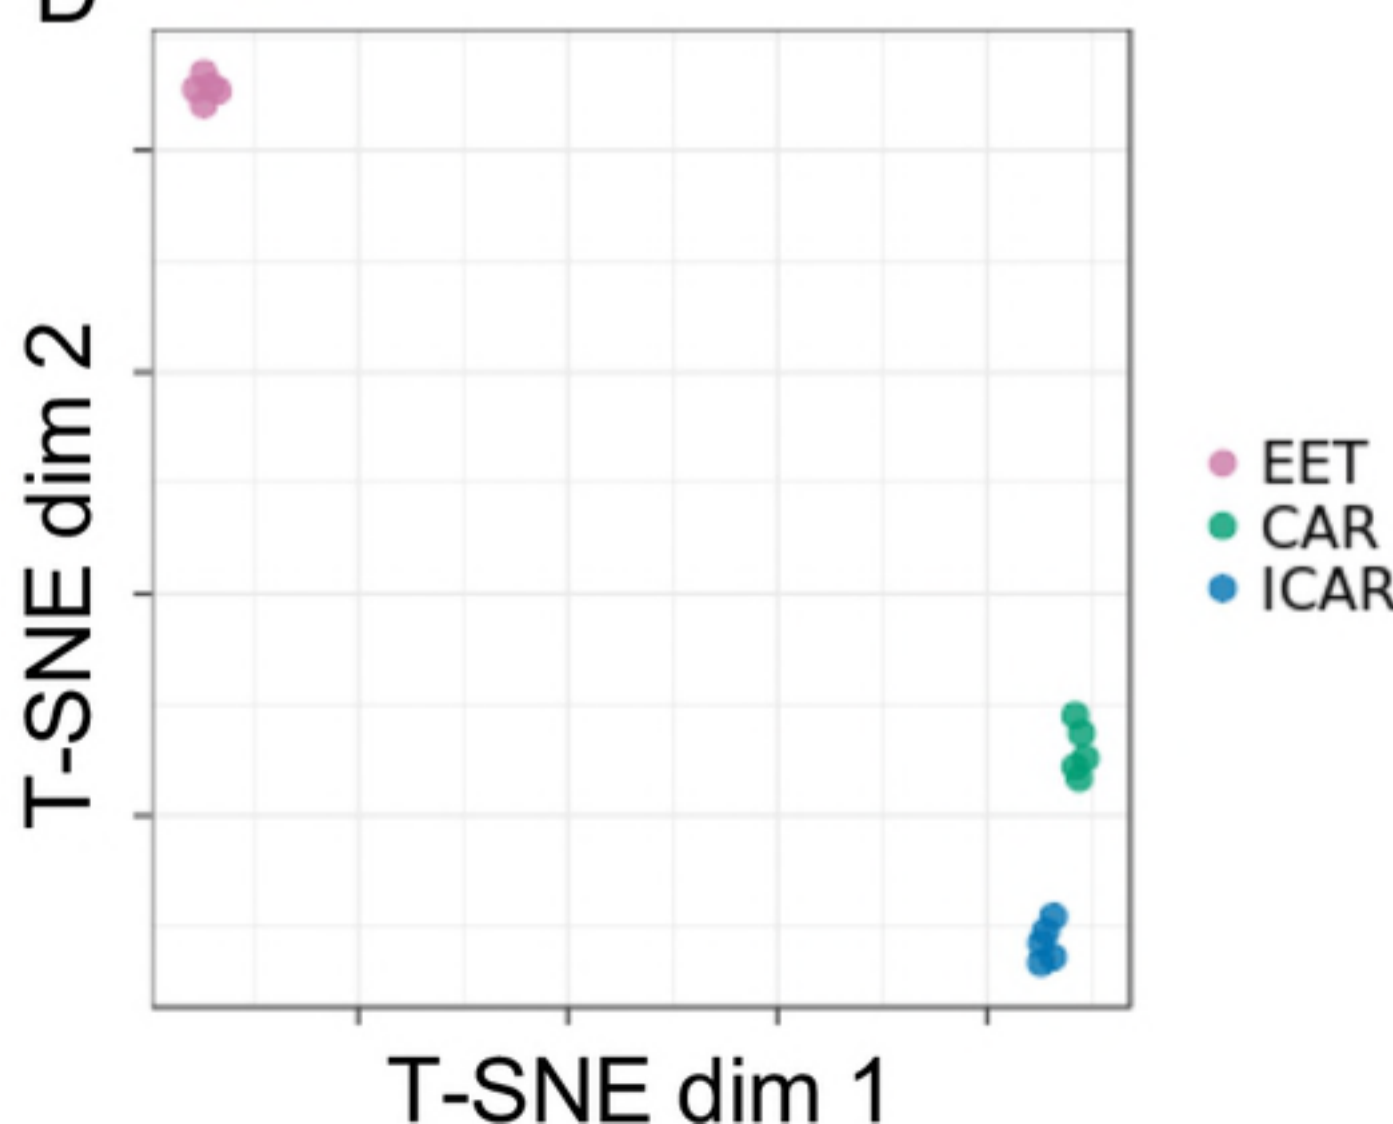

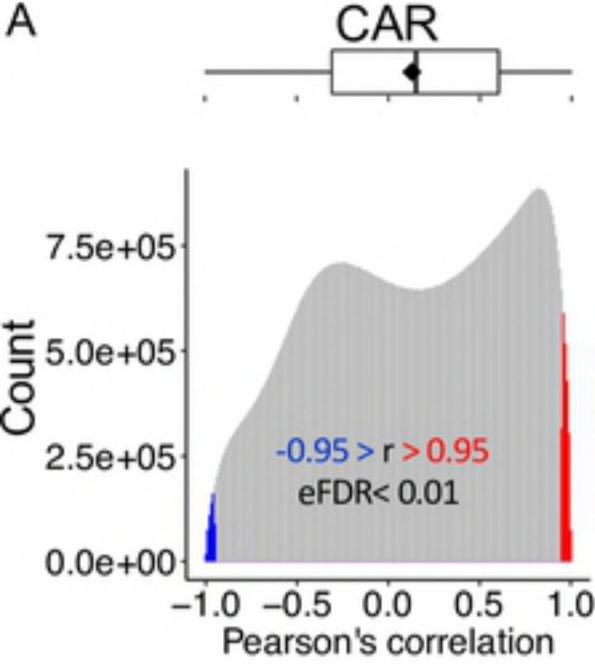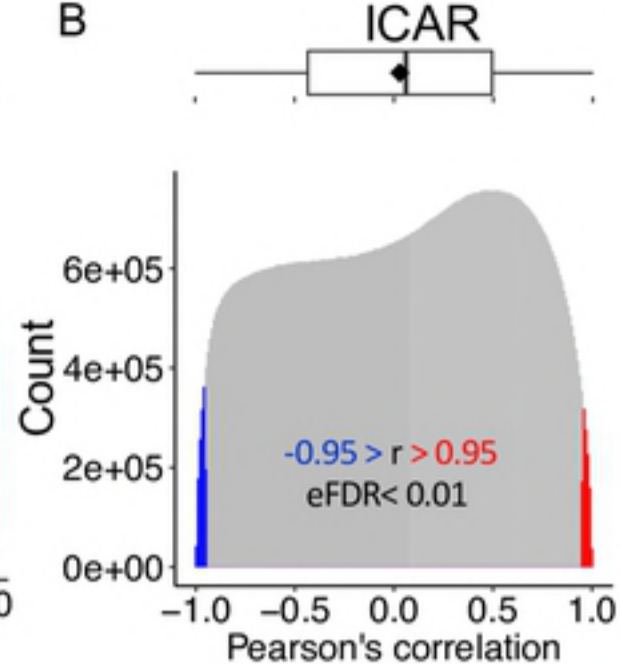

**C**

|                          |             | EET - CAR   |        |            |        |       |     |
|--------------------------|-------------|-------------|--------|------------|--------|-------|-----|
|                          |             | $r < -0.95$ |        | $r > 0.95$ |        |       |     |
| # connections            |             | 590,640     |        | 2,230,863  |        |       |     |
| # genes EET # genes ENDO |             | 9,548       | 10,411 | 9,548      | 12,430 |       |     |
| EET - ICAR               | $r < -0.95$ | 1,352,768   |        | 4,003      | 19,978 |       |     |
|                          | $r > 0.95$  | 9,548       | 10,873 | 2,839      | 260    |       |     |
|                          |             | 1,191,458   |        | 15,215     | 10,104 |       |     |
|                          |             | 9,548       | 11,504 | 3,388      | 288    | 4,395 | 393 |

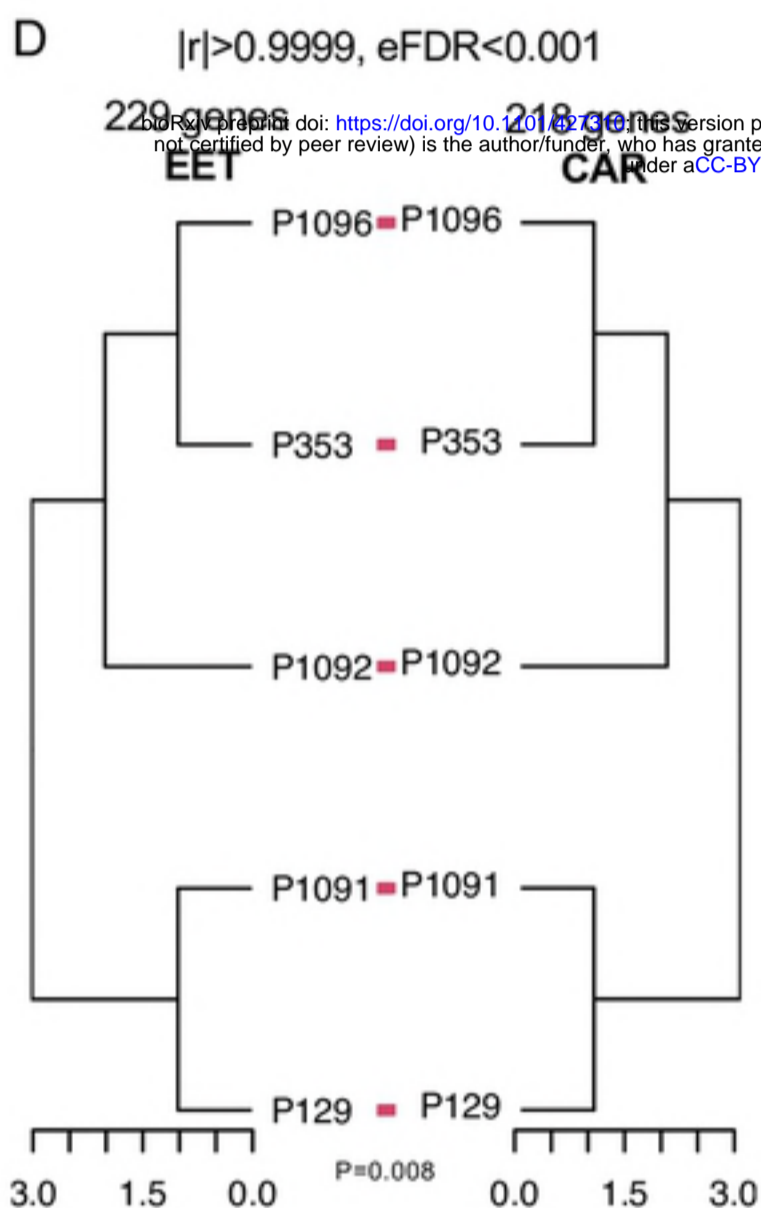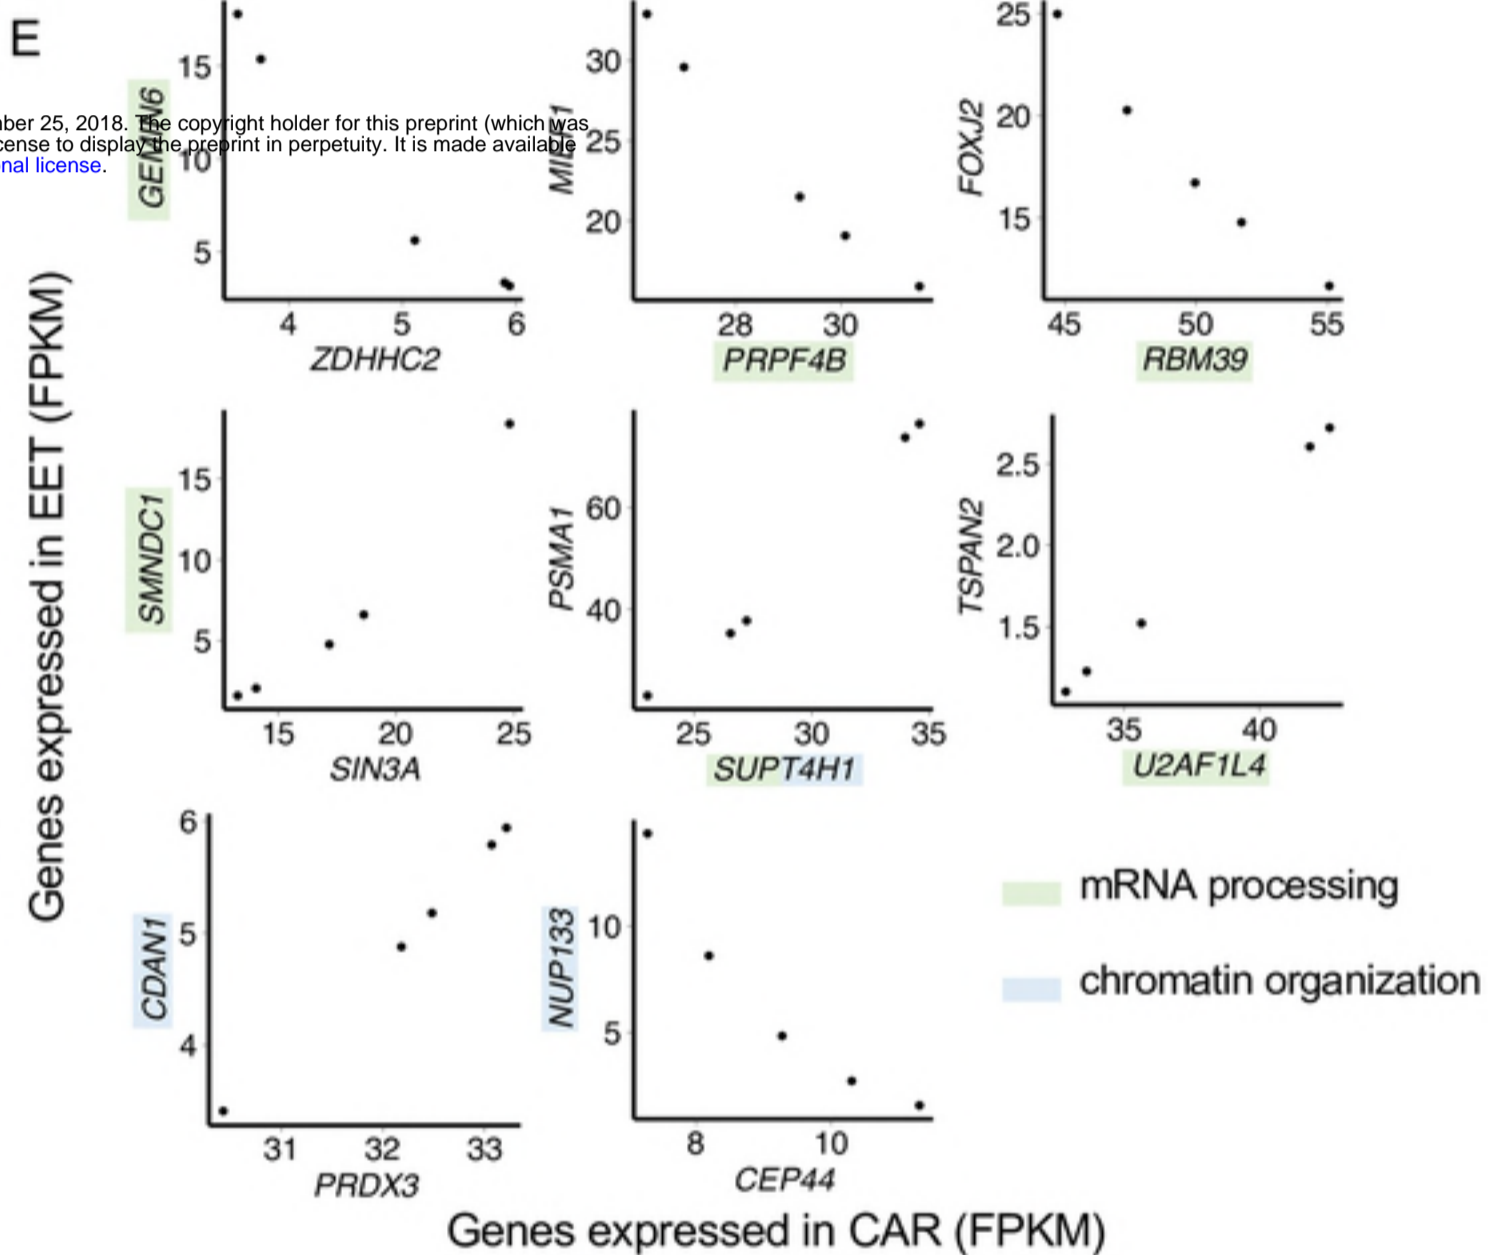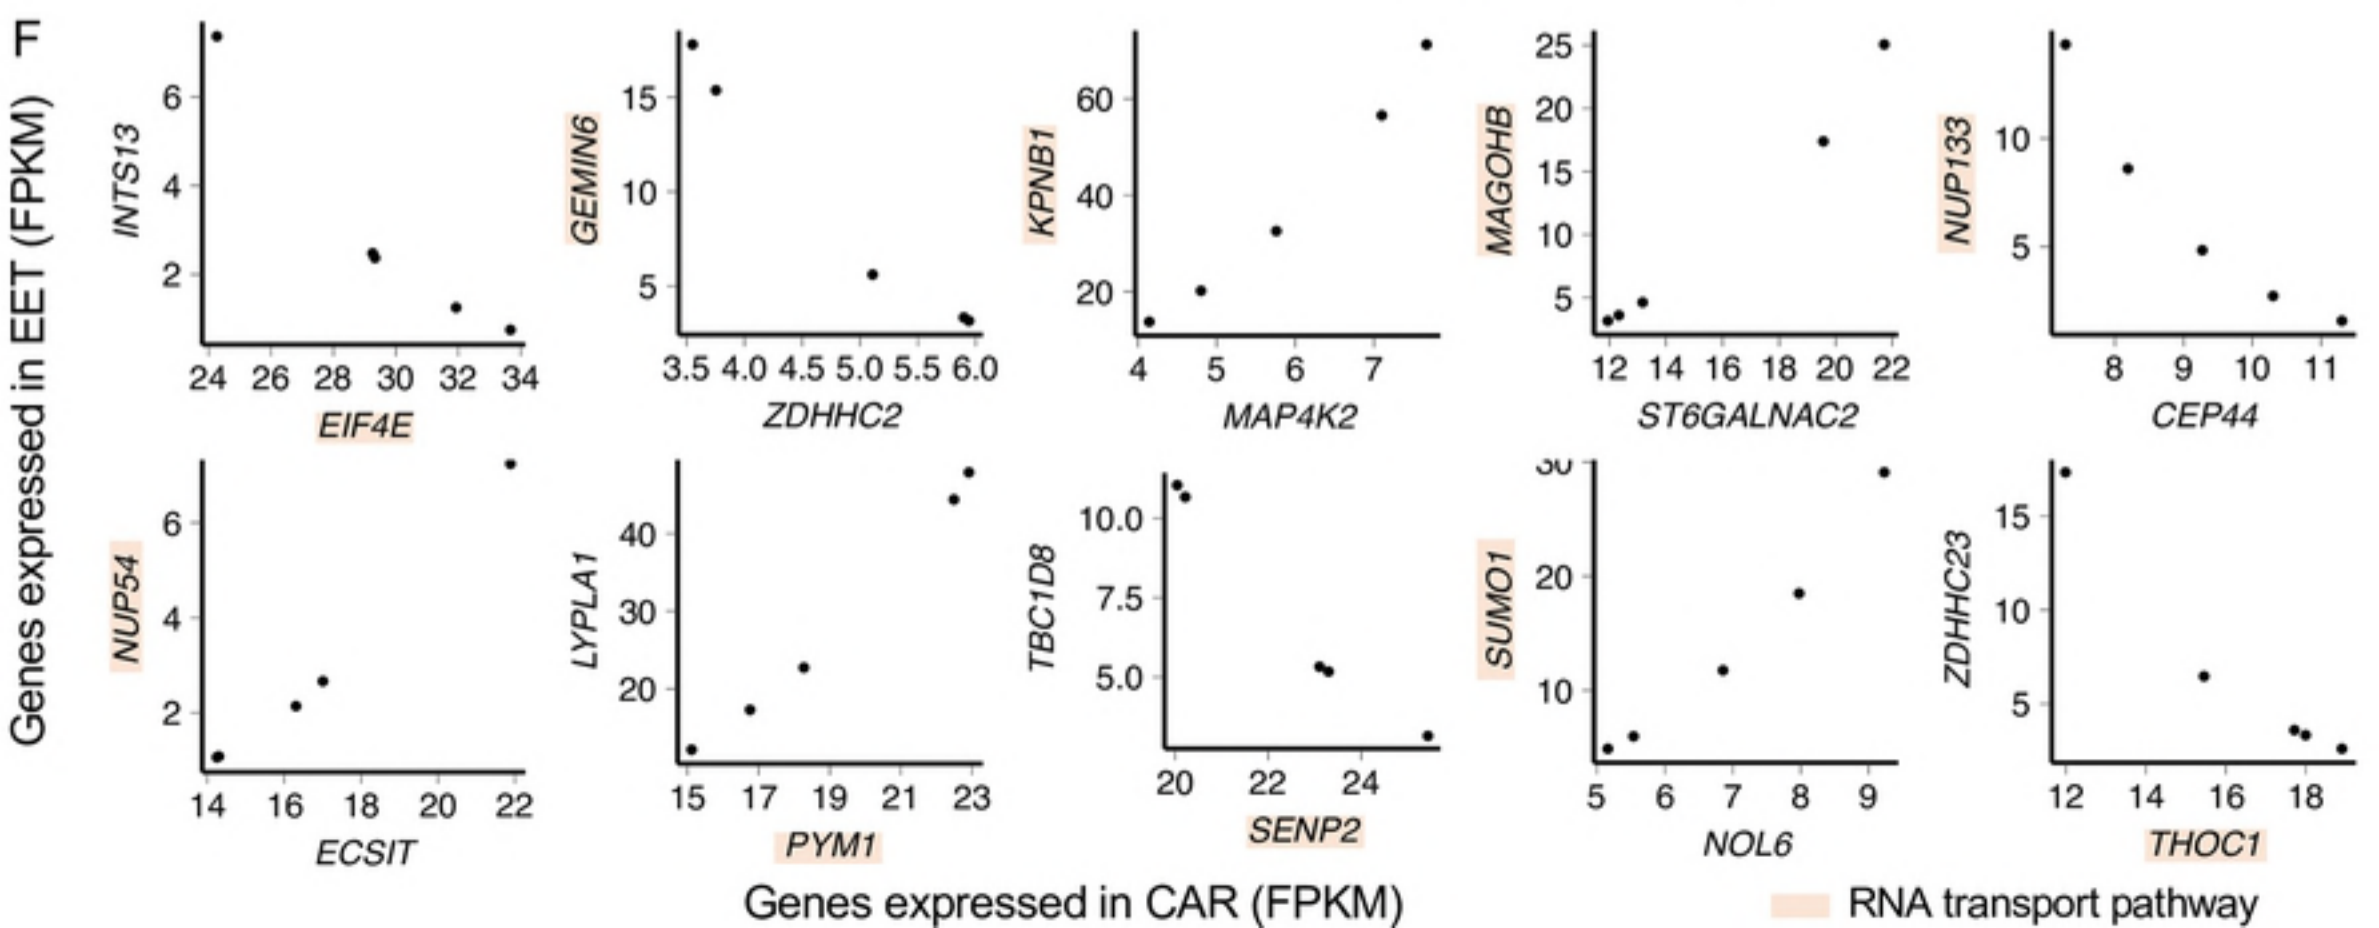

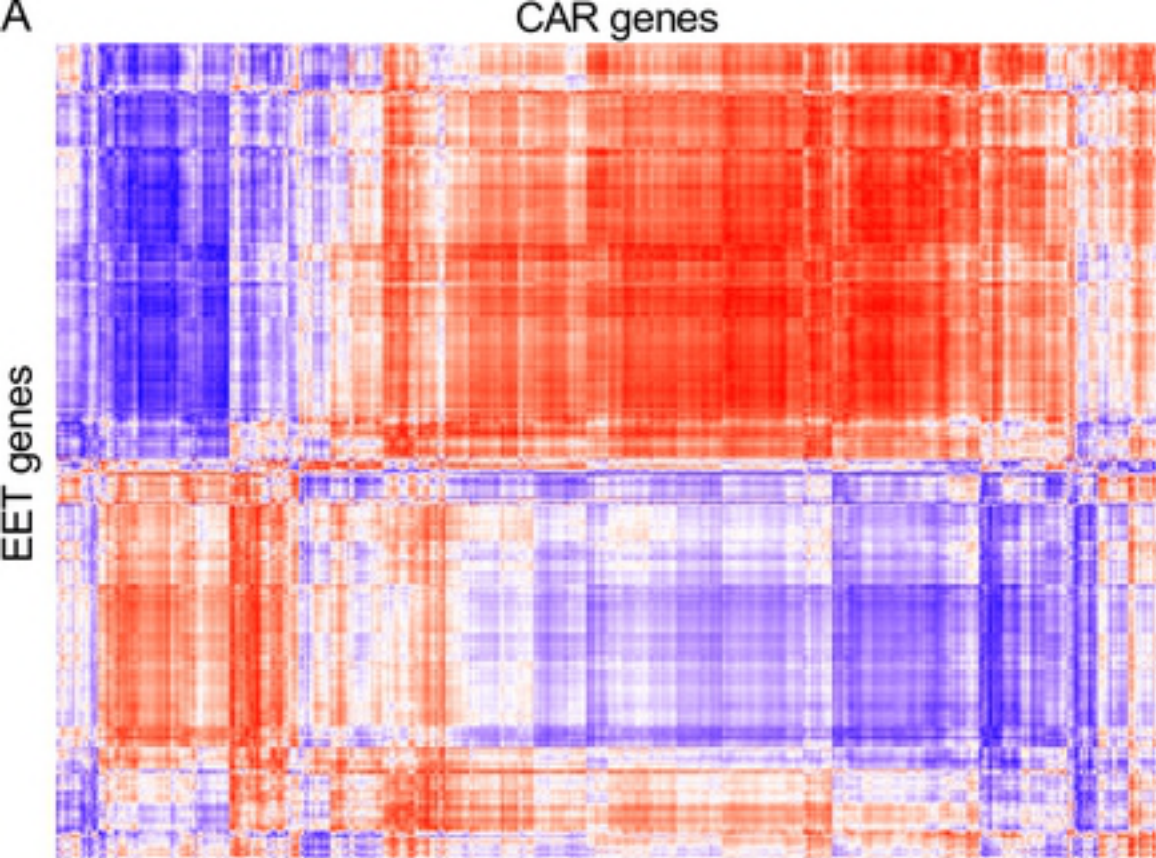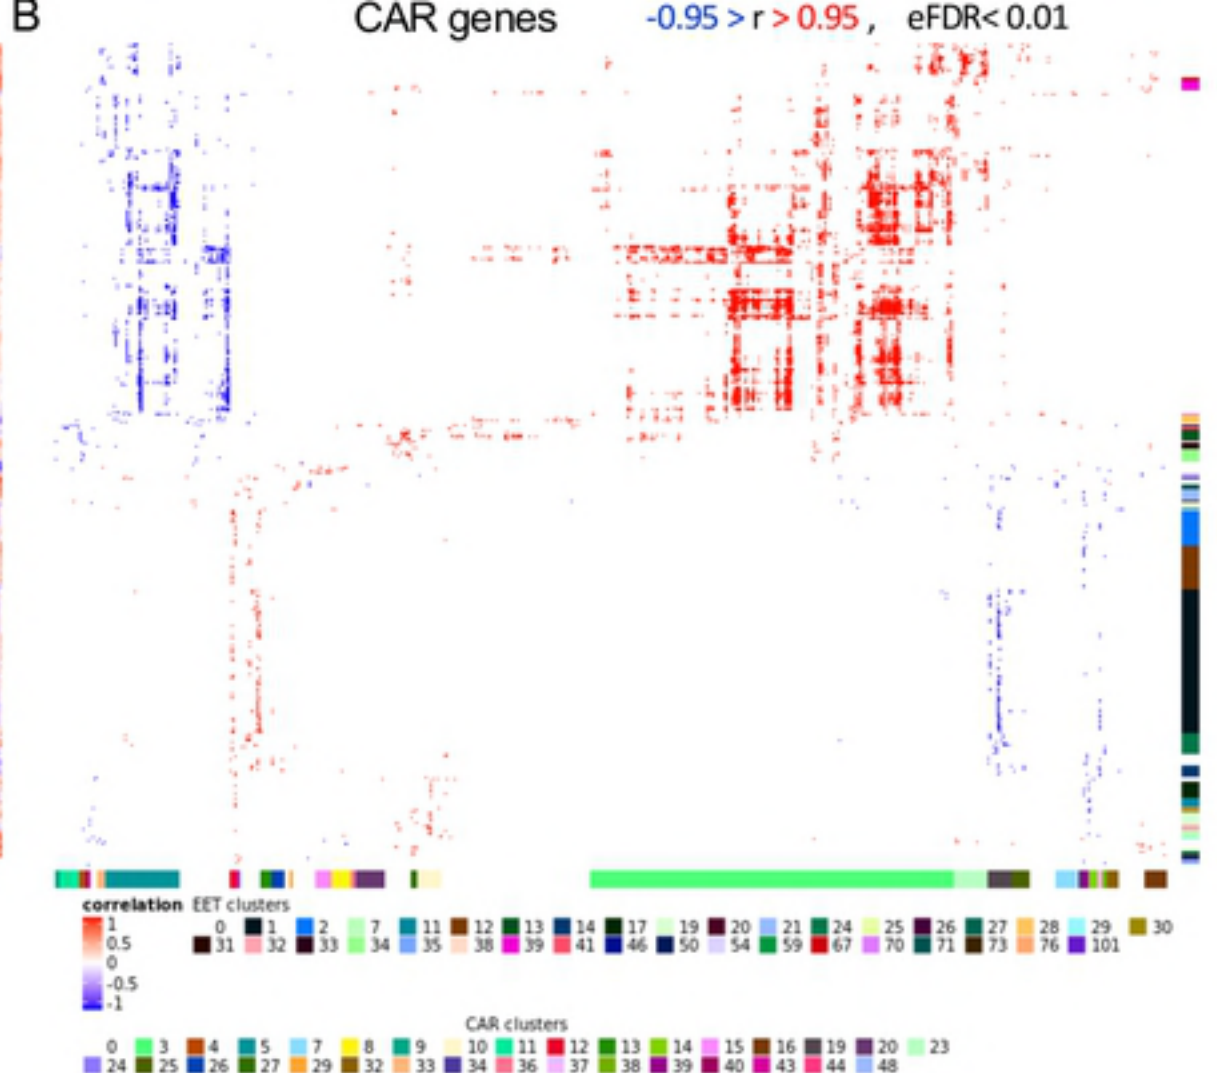

- C**
- EET genes, positive regulation of cell proliferation
  - CAR genes, regulation of transcription, DNA-templated

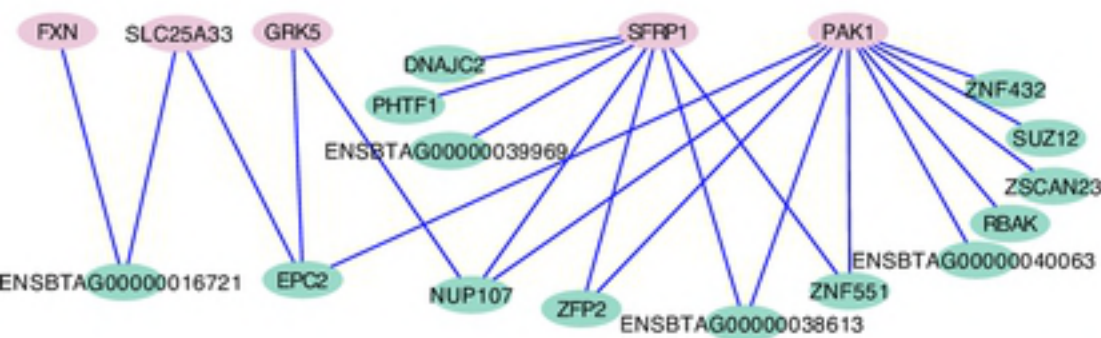

- D**
- EET genes, transmembrane transport
  - CAR genes, regulation of transcription, DNA-templated

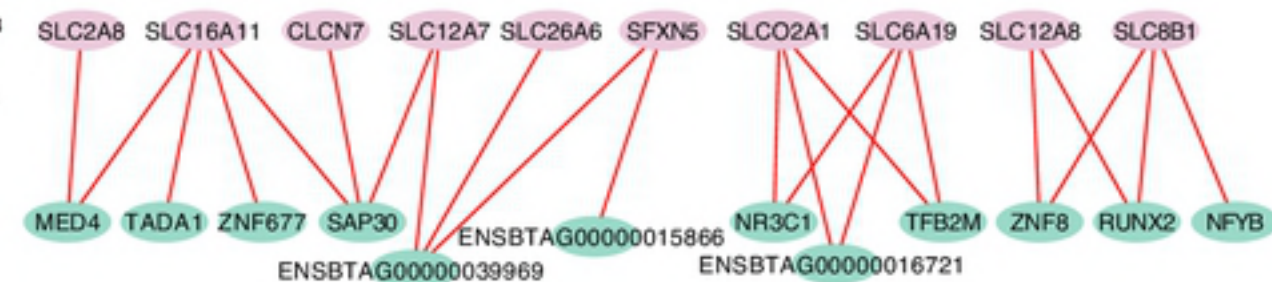

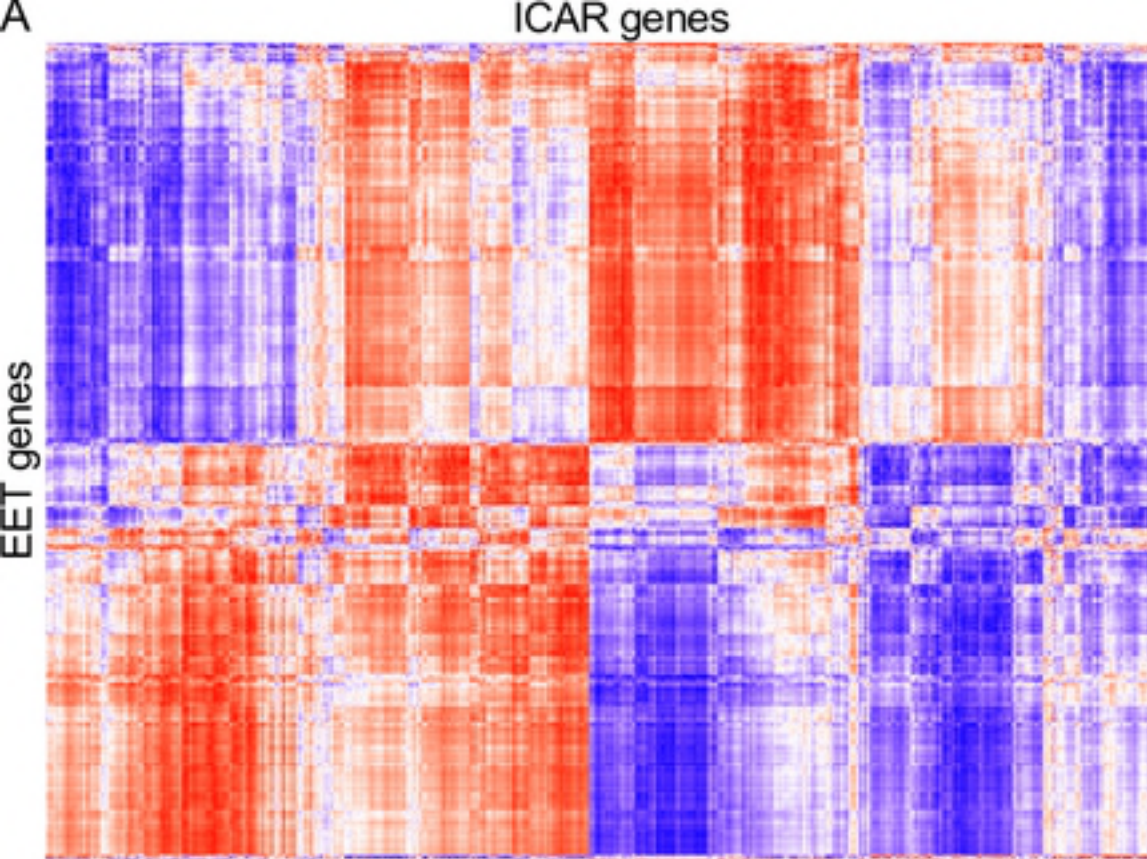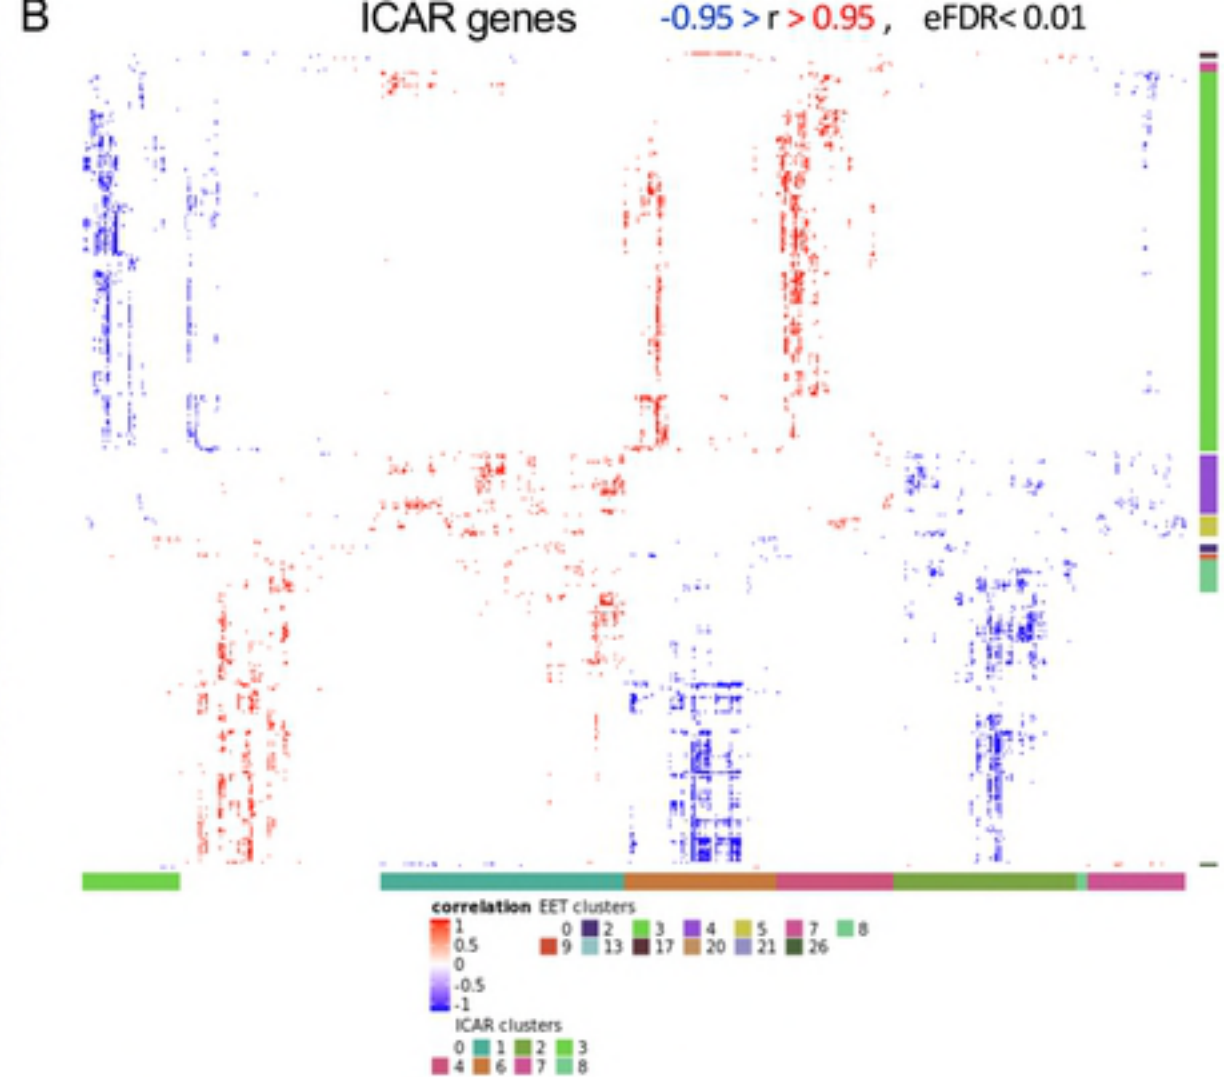

- C**
- EET genes, stem cell population maintenance
  - ICAR genes, regulation of transcription

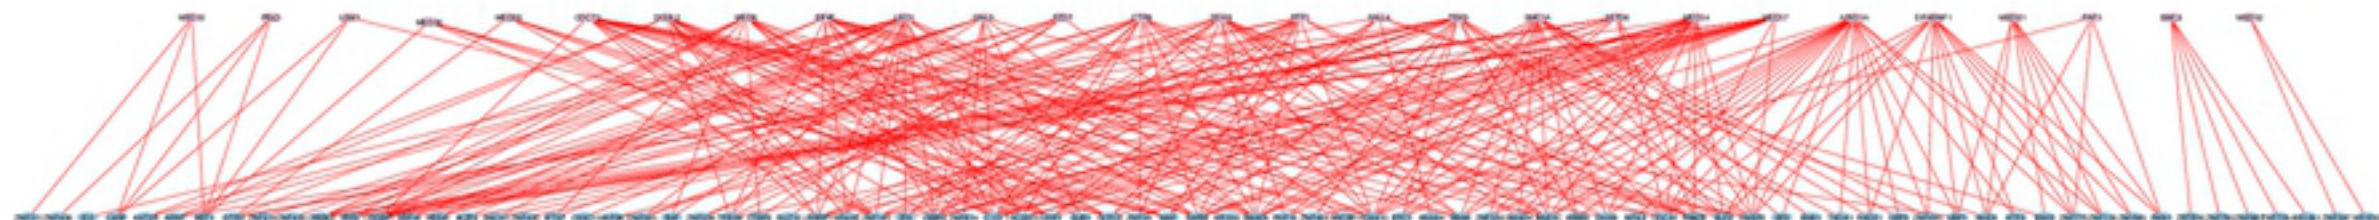

- D**
- EET genes, placenta development
  - ICAR genes, oxidation-reduction process

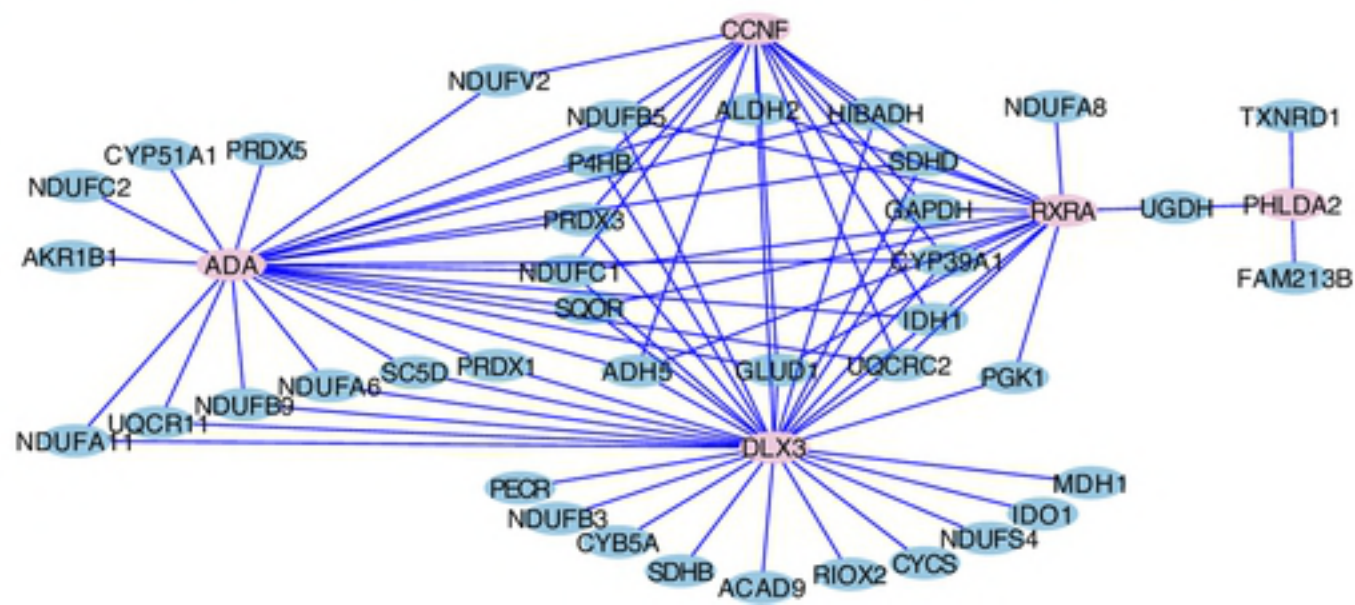



# EXTRA-EMBRYONIC TISSUE

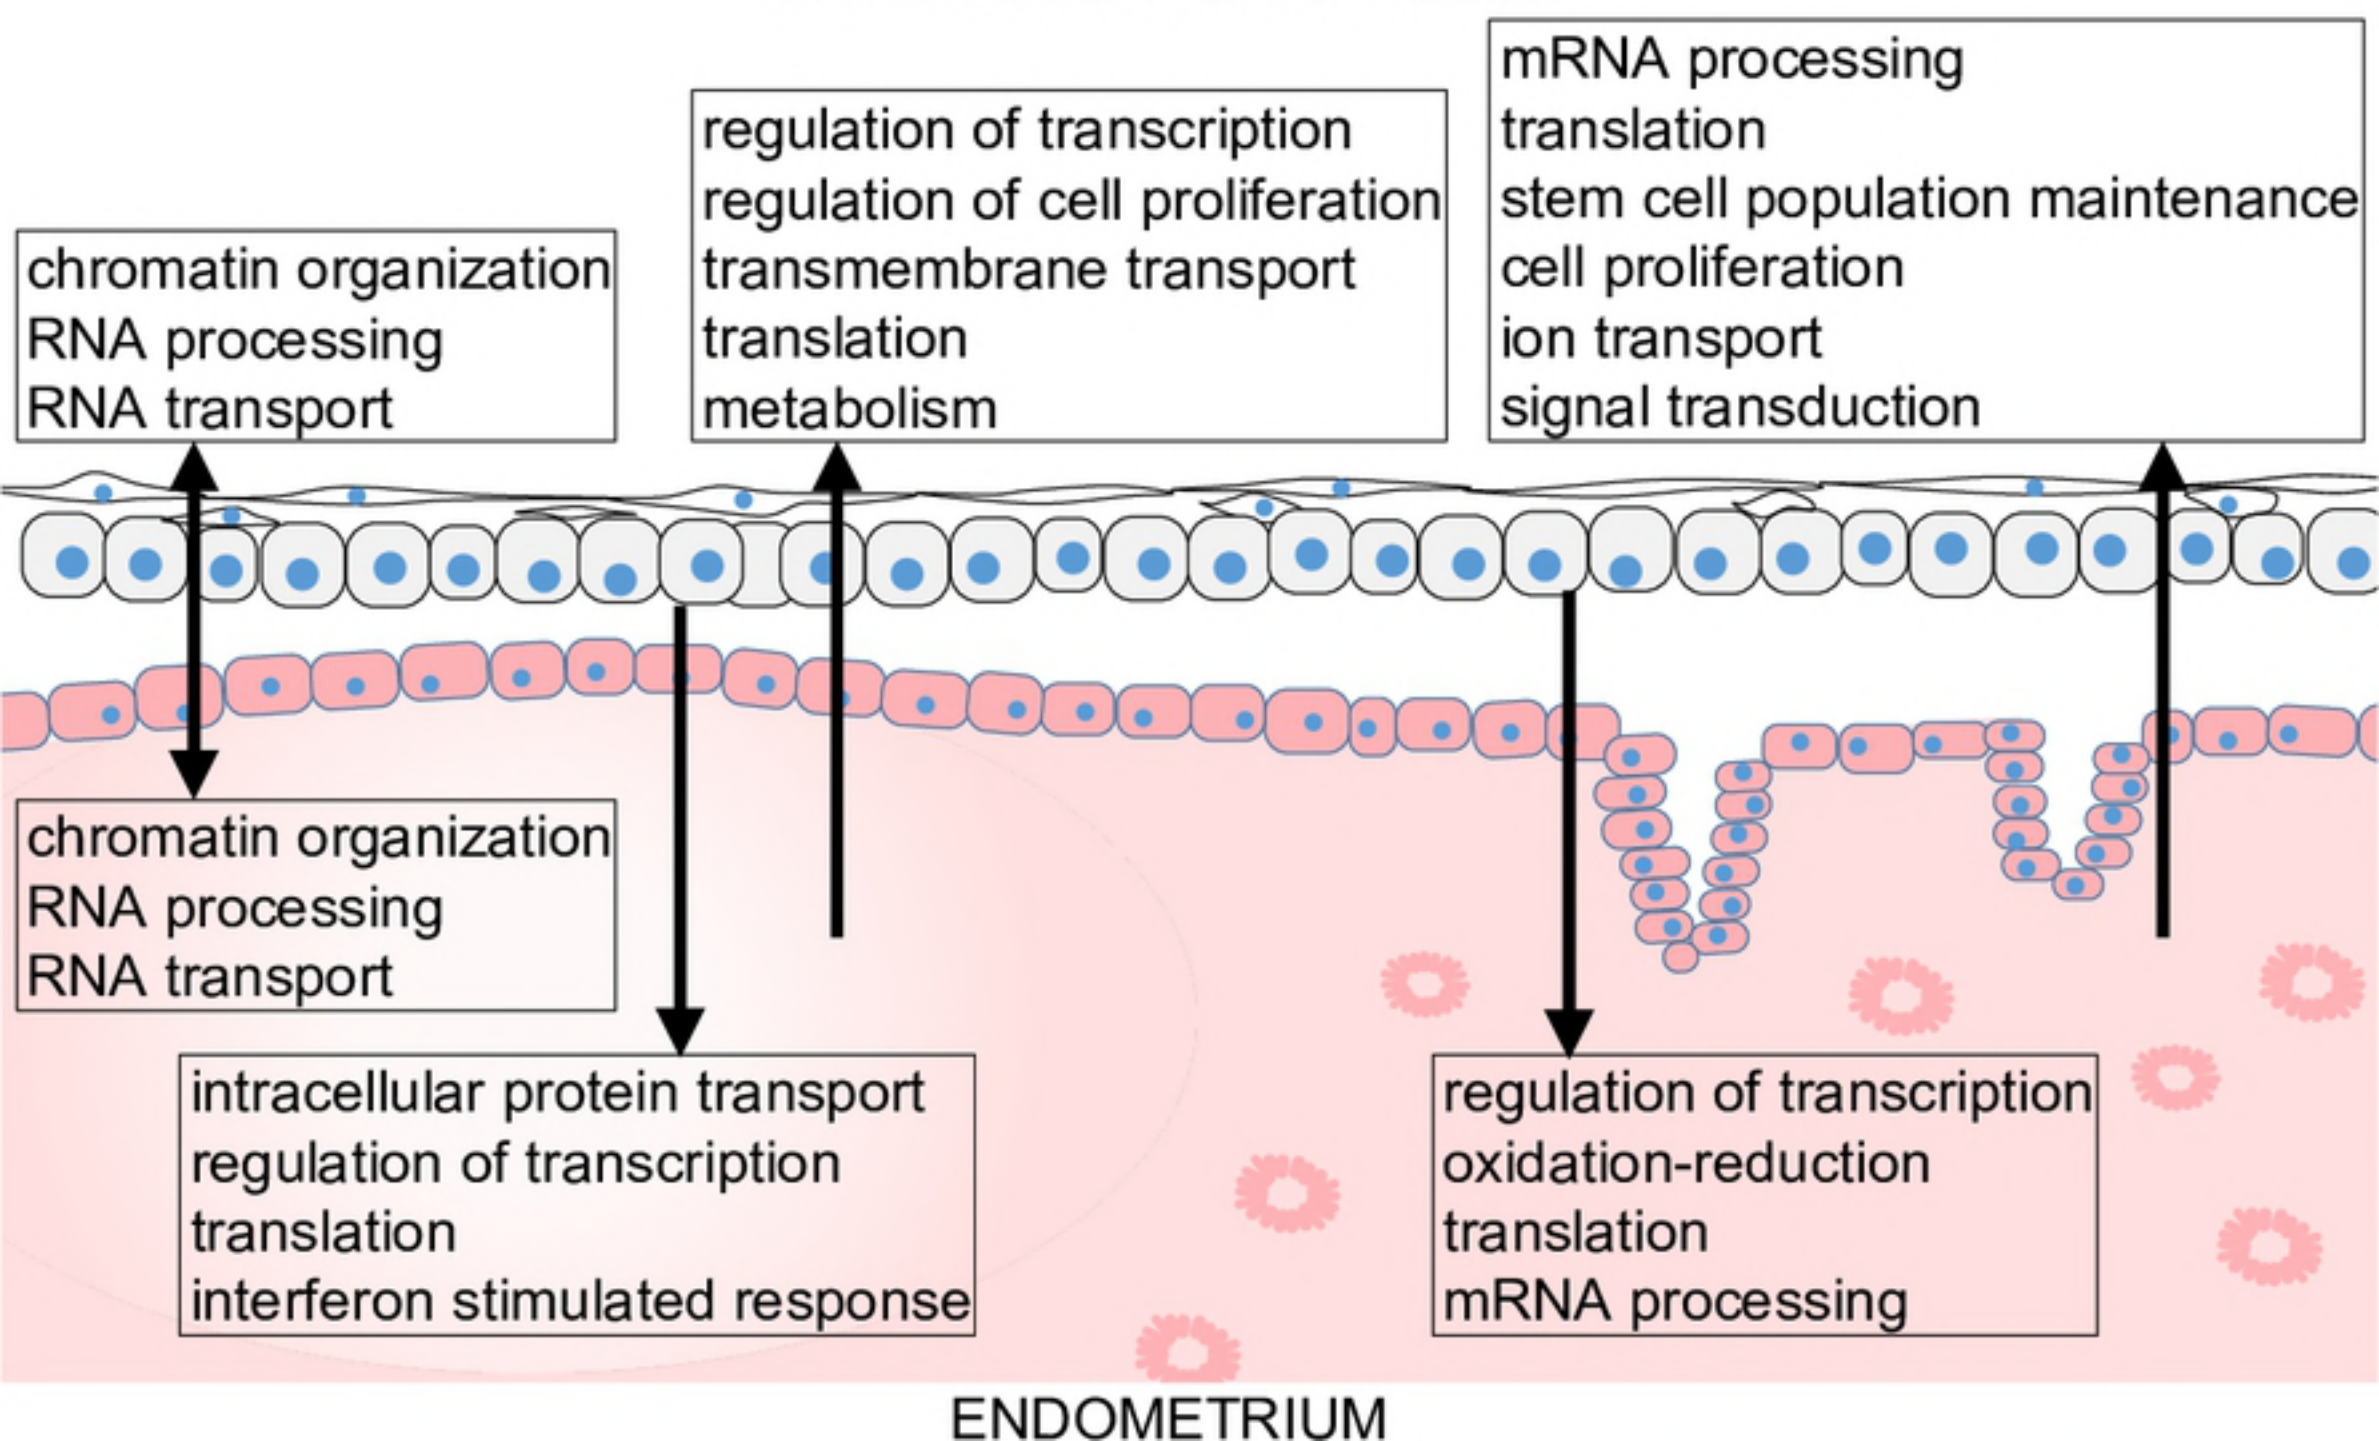

Source: http://biorxiv.org/content/10.1101/427310v1.full.pdf
